# Supplementary material for: Intermolecular hydrogen bonding behavior of amino acid radical cations
Source: Royal Society of Chemistry journal article supplement (doi:10.1039/d4ob00301b), 2024-01-01
Supplement: d4ob00301b1.pdf [file d4ob00301b1.pdf]

## Supporting Information

for

### Intermolecular Hydrogen Bonding Behavior of Amino Acid Radical Cations

Isabella Moppel, BarbaraAnn Elliott and Shuming Chen\*

\*Corresponding email: [shuming.chen@oberlin.edu](mailto:shuming.chen@oberlin.edu)

#### Table of Contents

|                                                                      |     |
|----------------------------------------------------------------------|-----|
| I. Comparison to Complexes Optimized with Implicit Water.....        | S2  |
| II. Evaluation of Basis Set Superposition Error (BSSE) Energies..... | S3  |
| III. Calculated Energies.....                                        | S4  |
| IV. Cartesian Coordinates of Calculated Structures.....              | S6  |
| V. References.....                                                   | S27 |

## I. Comparison to Complexes Optimized with Implicit Water

To demonstrate the effect of implicit water solvation on the intermolecular hydrogen bonding behavior of amino acid radical cations, we re-optimized structures **4a–4d** and **7a–7d** incorporating implicit water solvation and evaluated complexation free energies using the SMD model (Figure S1). Overall, complexation free energies were found to be significantly more positive with implicit water solvation compared to the gas phase. The energy ordering of hydrogen-bonded complexes also differ compared to the gas phase. These results indicate that microsolvation environments and bulk solvation environments can significantly alter the intermolecular hydrogen-bonding behavior of amino acid radical cations.

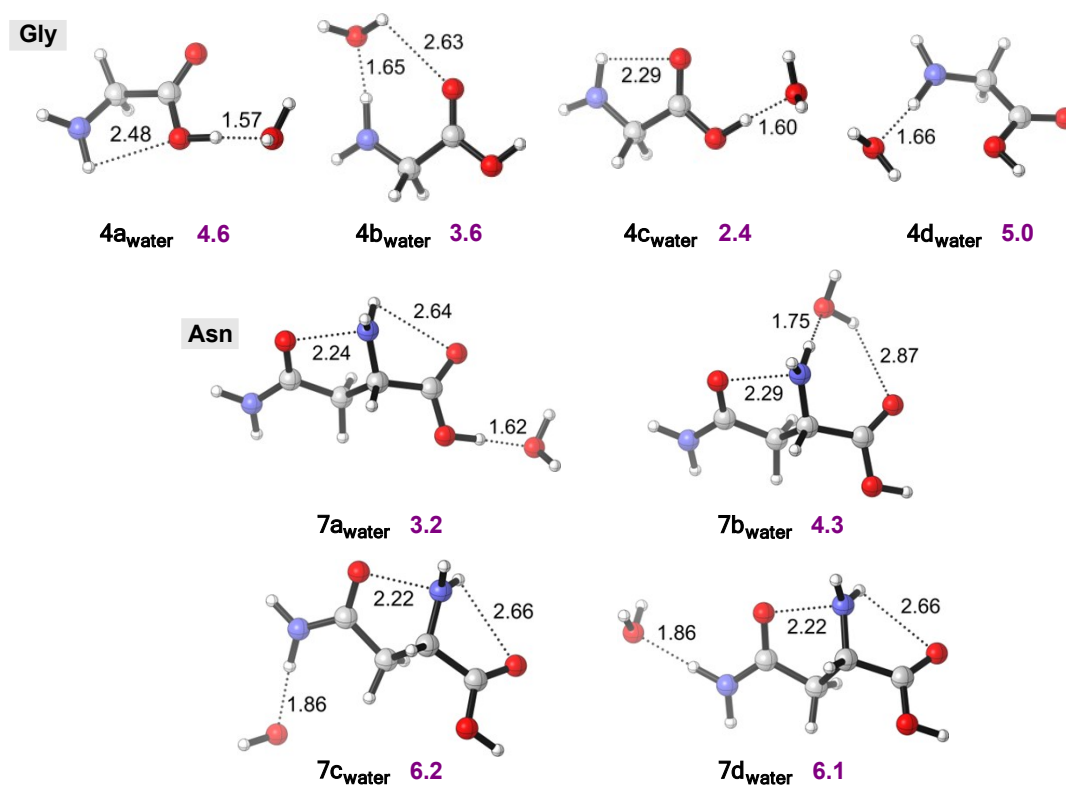

**Figure S1.** Computed structures and complexation free energies (in kcal/mol) for hydrogen-bonded complexes between water and amino acid radical cations at the  $\omega$ B97X-D/def2-QZVPPD, SMD(H<sub>2</sub>O)// $\omega$ B97X-D/def2-TZVPP, SMD(H<sub>2</sub>O) level of theory. Interatomic distances are in Å.

## II. Evaluation of Basis Set Superposition Error (BSSE) Energies

To evaluate the magnitude of BSSE under our chosen computational level of theory, we conducted BSSE energy calculations on representative hydrogen-bonded complex structures using the Boys-Benardi counterpoise method<sup>1</sup> implemented in Gaussian 16. Our calculations showed that BSSE energy corrections for these structures are generally small (<0.1 kcal/mol) and show

very low variability from structure to structure. They are therefore not expected to impact the relative favorability of hydrogen-bonded complexes examined in this study.

**Table S1.** BSSE energies for representative structures calculated using the counterpoise method.

| Structure  | BSSE Energy<br>(kcal/mol) |
|------------|---------------------------|
| <b>4a</b>  | 0.09                      |
| <b>4b</b>  | 0.09                      |
| <b>4c</b>  | 0.09                      |
| <b>4d</b>  | 0.08                      |
| <b>8a</b>  | 0.09                      |
| <b>10a</b> | 0.08                      |
| <b>17a</b> | 0.09                      |

### III. Calculated Energies

**Table S2.** Calculated energies in Hartrees.

| Structure                                                 | $\Delta G$ [ $\omega$ B97X-D/<br>def2-TZVPP] | $E$ [ $\omega$ B97X-D/<br>def2-QZVPPD] | $G_{\text{HFIP}} (= \Delta G + E)$ |
|-----------------------------------------------------------|----------------------------------------------|----------------------------------------|------------------------------------|
| <b>H<sub>2</sub>O</b>                                     | 0.004120                                     | -76.443659                             | -76.439539                         |
| <b>MeCOOH</b>                                             | 0.035170                                     | -229.116260                            | -229.081090                        |
| <b>MeCOOH<math>\cdot</math></b>                           | 0.032742                                     | -228.732161                            | -228.699419                        |
| <b>MeNH<sub>2</sub></b>                                   | 0.041589                                     | -95.870202                             | -95.828613                         |
| <b>MeNH<sub>2</sub><math>\cdot</math></b>                 | 0.037235                                     | -95.541944                             | -95.504709                         |
| <b>NH<sub>2</sub>CH<sub>2</sub>COOH</b>                   | 0.051669                                     | -284.468698                            | -284.417029                        |
| <b>NH<sub>2</sub>CH<sub>2</sub>COOH<math>\cdot</math></b> | 0.048803                                     | -284.136430                            | -284.087627                        |
| <b>1a</b>                                                 | 0.056672                                     | -305.576318                            | -305.519646                        |
| <b>1b</b>                                                 | 0.051509                                     | -305.217571                            | -305.166062                        |
| <b>2a</b>                                                 | 0.059602                                     | -172.325703                            | -172.266101                        |
| <b>2b</b>                                                 | 0.056144                                     | -172.017981                            | -171.961837                        |
| <b>3a</b>                                                 | 0.072387                                     | -360.923377                            | -360.850990                        |
| <b>3b</b>                                                 | 0.068162                                     | -360.610614                            | -360.542452                        |
| <b>A</b>                                                  | 0.073208                                     | -360.931112                            | -360.857904                        |
| <b>B</b>                                                  | 0.099937                                     | -400.248725                            | -400.148788                        |
| <b>C</b>                                                  | 0.135204                                     | -477.664413                            | -477.529209                        |
| <b>D</b>                                                  | 0.123471                                     | -568.971208                            | -568.847737                        |
| <b>E</b>                                                  | 0.151994                                     | -608.292986                            | -608.140992                        |
| <b>F</b>                                                  | 0.147488                                     | -625.283280                            | -625.135792                        |
| <b>G</b>                                                  | 0.202811                                     | -762.880663                            | -762.677852                        |

|               |          |              |              |
|---------------|----------|--------------|--------------|
| <b>H</b>      | 0.175355 | -631.300575  | -631.125220  |
| <b>I</b>      | 0.178535 | -706.536420  | -706.357885  |
| <b>J</b>      | 0.104124 | -475.473787  | -475.369663  |
| <b>K</b>      | 0.096613 | -798.444683  | -798.348070  |
| <b>L</b>      | 0.094115 | -2801.856907 | -2801.762792 |
| <b>M</b>      | 0.129650 | -514.794358  | -514.664708  |
| <b>N</b>      | 0.150536 | -877.079570  | -876.929034  |
| <b>Gly I</b>  | 0.048804 | -284.136429  | -284.087625  |
| <b>Gly II</b> | 0.049737 | -284.137346  | -284.087609  |
| <b>Ala</b>    | 0.076138 | -323.464250  | -323.388112  |
| <b>Pro</b>    | 0.110775 | -400.907152  | -400.796377  |
| <b>Asn</b>    | 0.102037 | -492.210149  | -492.108112  |
| <b>Gln</b>    | 0.129577 | -531.539431  | -531.409854  |
| <b>His</b>    | 0.123685 | -548.528551  | -548.404866  |
| <b>Trp</b>    | 0.180144 | -686.150896  | -685.970752  |
| <b>Phe</b>    | 0.150613 | -554.533280  | -554.382667  |
| <b>Tyr</b>    | 0.155830 | -629.787985  | -629.632155  |
| <b>Ser</b>    | 0.079896 | -398.696456  | -398.616560  |
| <b>Cys</b>    | 0.073251 | -721.668958  | -721.595707  |
| <b>Sel</b>    | 0.073307 | -2725.096372 | -2725.023065 |
| <b>Thr</b>    | 0.104664 | -438.028972  | -437.924308  |
| <b>Met</b>    | 0.126760 | -800.319644  | -800.192884  |
| <b>4a</b>     | 0.067314 | -360.612611  | -360.545297  |
| <b>4b</b>     | 0.068266 | -360.610614  | -360.542348  |
| <b>4c</b>     | 0.067001 | -360.607346  | -360.540345  |
| <b>4d</b>     | 0.068437 | -360.608472  | -360.540035  |
| <b>5a</b>     | 0.094245 | -399.938608  | -399.844363  |
| <b>5b</b>     | 0.094786 | -399.937083  | -399.842297  |
| <b>5c</b>     | 0.094628 | -399.934653  | -399.840025  |
| <b>5d</b>     | 0.096083 | -399.935544  | -399.839461  |
| <b>5e</b>     | 0.093799 | -399.933195  | -399.839396  |
| <b>5f</b>     | 0.093389 | -399.927853  | -399.834464  |
| <b>6a</b>     | 0.129964 | -477.378571  | -477.248607  |
| <b>6b</b>     | 0.130452 | -477.376752  | -477.246300  |
| <b>6c</b>     | 0.129810 | -477.375500  | -477.245690  |
| <b>6d</b>     | 0.129195 | -477.368117  | -477.238922  |
| <b>7a</b>     | 0.121352 | -568.677646  | -568.556294  |
| <b>7b</b>     | 0.122996 | -568.677887  | -568.554891  |
| <b>7c</b>     | 0.122058 | -568.675234  | -568.553176  |

|            |          |              |              |
|------------|----------|--------------|--------------|
| <b>7d</b>  | 0.120298 | -568.672851  | -568.552553  |
| <b>8a</b>  | 0.149391 | -608.006443  | -607.857052  |
| <b>8b</b>  | 0.148908 | -608.002875  | -607.853967  |
| <b>8c</b>  | 0.147891 | -608.000122  | -607.852231  |
| <b>8d</b>  | 0.148940 | -607.998090  | -607.849150  |
| <b>9a</b>  | 0.144119 | -625.001477  | -624.857358  |
| <b>9b</b>  | 0.143439 | -624.999923  | -624.856484  |
| <b>9c</b>  | 0.146133 | -625.000554  | -624.854421  |
| <b>9d</b>  | 0.143830 | -624.997212  | -624.853382  |
| <b>9e</b>  | 0.146754 | -624.999893  | -624.853139  |
| <b>10a</b> | 0.199346 | -762.619289  | -762.419943  |
| <b>10b</b> | 0.201503 | -762.612819  | -762.411316  |
| <b>10c</b> | 0.200872 | -762.611225  | -762.410353  |
| <b>10d</b> | 0.199940 | -762.603595  | -762.403655  |
| <b>11a</b> | 0.170419 | -631.000757  | -630.830338  |
| <b>11b</b> | 0.171123 | -631.000828  | -630.829705  |
| <b>11c</b> | 0.171322 | -631.000491  | -630.829169  |
| <b>11d</b> | 0.171392 | -630.998395  | -630.827003  |
| <b>12a</b> | 0.176114 | -706.258564  | -706.082450  |
| <b>12b</b> | 0.176645 | -706.250201  | -706.073556  |
| <b>12c</b> | 0.174896 | -706.245678  | -706.070782  |
| <b>12d</b> | 0.176703 | -706.244859  | -706.068156  |
| <b>13a</b> | 0.099407 | -475.166174  | -475.066767  |
| <b>13b</b> | 0.098924 | -475.164197  | -475.065273  |
| <b>13c</b> | 0.098675 | -475.163843  | -475.065168  |
| <b>13d</b> | 0.097377 | -475.160574  | -475.063197  |
| <b>13e</b> | 0.100163 | -475.162707  | -475.062544  |
| <b>14a</b> | 0.093098 | -798.137745  | -798.044647  |
| <b>14b</b> | 0.092627 | -798.134995  | -798.042368  |
| <b>14c</b> | 0.094032 | -798.134827  | -798.040795  |
| <b>14d</b> | 0.093082 | -798.130776  | -798.037694  |
| <b>15a</b> | 0.092011 | -2801.565351 | -2801.473340 |
| <b>15b</b> | 0.092905 | -2801.560249 | -2801.467344 |
| <b>15c</b> | 0.093515 | -2801.557353 | -2801.463838 |
| <b>15d</b> | 0.090903 | -2801.551927 | -2801.461024 |
| <b>16a</b> | 0.124617 | -514.497453  | -514.372836  |
| <b>16b</b> | 0.124502 | -514.494843  | -514.370341  |
| <b>16c</b> | 0.124897 | -514.494689  | -514.369792  |
| <b>16d</b> | 0.125121 | -514.488833  | -514.363712  |

|                |          |             |             |
|----------------|----------|-------------|-------------|
| <b>17a</b>     | 0.148303 | -876.790646 | -876.642343 |
| <b>17b</b>     | 0.146929 | -876.783972 | -876.637043 |
| <b>17c</b>     | 0.148273 | -876.784041 | -876.635768 |
| <b>17d</b>     | 0.146766 | -876.780370 | -876.633604 |
| <b>TS-Ala</b>  | 0.091407 | -399.922021 | -399.830614 |
| <b>TS-Gly</b>  | 0.064831 | -360.587862 | -360.523031 |
| <b>TS-Cys</b>  | 0.090711 | -798.115067 | -798.024356 |
| <b>TS-Ser</b>  | 0.095243 | -475.141295 | -475.046052 |
| <b>PRC-Ala</b> | 0.087904 | -399.930519 | -399.842615 |
| <b>PRC-Gly</b> | 0.063069 | -360.592806 | -360.529737 |
| <b>PRC-Cys</b> | 0.087067 | -798.127317 | -798.040250 |
| <b>PRC-Ser</b> | 0.091466 | -475.148836 | -475.057370 |

#### **IV. Cartesian Coordinates of Calculated Structures**

|                       |            |             |             |
|-----------------------|------------|-------------|-------------|
| <b>H<sub>2</sub>O</b> |            |             |             |
| O                     | 0.00000000 | 0.00000000  | 0.11639100  |
| H                     | 0.00000000 | 0.75856900  | -0.46556500 |
| H                     | 0.00000000 | -0.75856900 | -0.46556500 |

|               |             |             |             |
|---------------|-------------|-------------|-------------|
| <b>MeCOOH</b> |             |             |             |
| C             | 1.38823300  | -0.12182300 | 0.00001700  |
| H             | 1.66403400  | -0.70399400 | -0.87873900 |
| C             | -0.09077900 | 0.12438900  | 0.00000700  |
| O             | -0.62571100 | 1.19768400  | 0.00000000  |
| O             | -0.78765300 | -1.02795500 | -0.00000800 |
| H             | -1.72099900 | -0.79107600 | 0.00003500  |
| H             | 1.66399500  | -0.70475600 | 0.87826200  |
| H             | 1.91515700  | 0.82659600  | 0.00036400  |

|                |             |             |             |
|----------------|-------------|-------------|-------------|
| <b>MeCOOH·</b> |             |             |             |
| C              | 1.35547900  | -0.30251100 | 0.00000100  |
| H              | 1.52979800  | -0.90366300 | -0.89704900 |
| C              | -0.08747500 | 0.05190000  | -0.00002400 |
| O              | -0.36339900 | 1.26901800  | -0.00000500 |
| O              | -0.98162000 | -0.86011000 | -0.00001800 |
| H              | -1.90019000 | -0.54191700 | 0.00015900  |
| H              | 1.53023000  | -0.90166200 | 0.89830500  |
| H              | 1.99229300  | 0.57964500  | -0.00109300 |

|                         |             |             |             |
|-------------------------|-------------|-------------|-------------|
| <b>MeNH<sub>2</sub></b> |             |             |             |
| N                       | 0.74638400  | 0.00000800  | -0.12041900 |
| H                       | 1.14816400  | 0.81099700  | 0.32737300  |
| C                       | -0.70367000 | 0.00000300  | 0.01751300  |
| H                       | -1.11356500 | -0.87704200 | -0.48394900 |
| H                       | 1.14825600  | -0.81096500 | 0.32734100  |
| H                       | -1.07183100 | -0.00000800 | 1.05111900  |
| H                       | -1.11369200 | 0.87694500  | -0.48402700 |

|                          |             |             |             |
|--------------------------|-------------|-------------|-------------|
| <b>MeNH<sub>2</sub>·</b> |             |             |             |
| N                        | 0.70599400  | 0.00000000  | -0.00855200 |
| H                        | 1.23852100  | 0.86664400  | 0.01884700  |
| C                        | -0.70120300 | 0.00000200  | -0.01494300 |
| H                        | -1.08793000 | -0.91274100 | -0.46677400 |
| H                        | 1.23851800  | -0.86664600 | 0.01884400  |
| H                        | -1.03591300 | -0.00004100 | 1.04531600  |
| H                        | -1.08793100 | 0.91277300  | -0.46671200 |

|                                         |             |             |             |
|-----------------------------------------|-------------|-------------|-------------|
| <b>NH<sub>2</sub>CH<sub>2</sub>COOH</b> |             |             |             |
| N                                       | 1.88207200  | 0.09970200  | -0.18945900 |
| H                                       | 1.72980900  | 1.04231000  | 0.14272500  |
| C                                       | 0.72509700  | -0.71796100 | 0.09799400  |
| H                                       | 0.64300100  | -1.54631300 | -0.60826800 |
| C                                       | -0.53626700 | 0.10134300  | 0.01296100  |
| O                                       | -0.58424000 | 1.29958200  | 0.04431200  |
| O                                       | -1.62985400 | -0.67167000 | -0.06353900 |
| H                                       | -2.39314800 | -0.08465400 | -0.07182500 |
| H                                       | 2.71160000  | -0.26820800 | 0.24893800  |
| H                                       | 0.71401500  | -1.16464100 | 1.10272500  |

|                                          |            |            |            |
|------------------------------------------|------------|------------|------------|
| <b>NH<sub>2</sub>CH<sub>2</sub>COOH·</b> |            |            |            |
| N                                        | 1.80658200 | 0.08814400 | 0.00008700 |

|   |             |             |             |
|---|-------------|-------------|-------------|
| H | 1.59214600  | 1.09625100  | 0.00003500  |
| C | 0.69242400  | -0.77072600 | -0.00008500 |
| H | 0.73780500  | -1.44592600 | -0.87026500 |
| C | -0.55956400 | 0.10739100  | -0.00001100 |
| O | -0.45666600 | 1.29942600  | -0.00004300 |
| O | -1.64860700 | -0.61695600 | 0.00007300  |
| H | -2.43515000 | -0.05356100 | 0.00004700  |
| H | 2.76636200  | -0.24715700 | 0.00017200  |
| H | 0.73778400  | -1.44636100 | 0.86974400  |

|           |             |             |             |
|-----------|-------------|-------------|-------------|
| <b>1a</b> |             |             |             |
| C         | 2.15647400  | -0.01674300 | -0.01113000 |
| H         | 2.47926700  | -0.59835000 | -0.87397300 |
| C         | 0.66093000  | 0.08797600  | -0.00270700 |
| O         | 0.05374600  | 1.13645200  | 0.00297900  |
| O         | 0.06697400  | -1.09920500 | 0.00085000  |
| H         | -0.90461000 | -0.96118500 | 0.01152000  |
| O         | -2.45390100 | -0.04368000 | 0.08606800  |
| H         | -1.86458100 | 0.72536900  | 0.05584300  |
| H         | -3.03288300 | 0.03054200  | -0.67099000 |
| H         | 2.48770200  | -0.54709700 | 0.88137000  |
| H         | 2.59613100  | 0.97479800  | -0.03991800 |

|           |             |             |             |
|-----------|-------------|-------------|-------------|
| <b>1b</b> |             |             |             |
| C         | 2.17194700  | -0.32937600 | 0.00002600  |
| H         | 2.34387400  | -0.93159500 | -0.89451600 |
| C         | 0.72634700  | 0.03843500  | -0.00002100 |
| O         | 0.49369200  | 1.27605800  | -0.00008800 |
| O         | -0.18225100 | -0.83057900 | 0.00008300  |
| H         | -1.17569600 | -0.47862800 | 0.00012900  |
| O         | -2.50984700 | 0.01842500  | -0.00000800 |
| H         | -3.06662900 | -0.08490500 | -0.77518300 |
| H         | -3.06718500 | -0.08282800 | 0.77503300  |
| H         | 2.34372100  | -0.93182100 | 0.89444900  |
| H         | 2.81939900  | 0.54418600  | 0.00016900  |

|           |             |             |             |
|-----------|-------------|-------------|-------------|
| <b>2a</b> |             |             |             |
| N         | 0.71015900  | 0.70832400  | 0.01842300  |
| H         | 1.07332000  | 1.30496700  | 0.74780500  |
| C         | 1.40049400  | -0.57915900 | 0.00161300  |
| H         | 0.95854000  | -1.20891000 | -0.76924600 |
| H         | 0.84146600  | 1.19762600  | -0.85574500 |
| O         | -2.04806300 | -0.15143400 | -0.10377800 |
| H         | -2.42552900 | -0.20134200 | 0.77201200  |
| H         | -1.16069800 | 0.22679000  | 0.02033900  |
| H         | 2.47782900  | -0.51031500 | -0.17979500 |
| H         | 1.24550000  | -1.08065200 | 0.95621500  |

|           |             |             |             |
|-----------|-------------|-------------|-------------|
| <b>2b</b> |             |             |             |
| N         | -0.63764000 | 0.58543200  | -0.00017900 |
| H         | -0.92232800 | 1.56073100  | 0.00056300  |
| C         | -1.62383100 | -0.42238900 | -0.00028600 |
| H         | -1.17290900 | -1.40855800 | -0.00509900 |
| H         | 0.39310000  | 0.35828000  | 0.00001900  |
| O         | 1.93411000  | -0.13452300 | -0.00011400 |
| H         | 2.49897200  | -0.21464100 | 0.77004800  |
| H         | 2.50113600  | -0.21439800 | -0.76870100 |
| H         | -2.27812600 | -0.28773600 | 0.87438600  |

|           |             |             |             |          |             |             |             |
|-----------|-------------|-------------|-------------|----------|-------------|-------------|-------------|
| H         | -2.28626600 | -0.28118800 | -0.86734000 | O        | 0.82110600  | 0.94806200  | -0.68563600 |
| <b>3a</b> |             |             |             | H        | 1.76833100  | 0.80288500  | -0.46957300 |
| N         | -0.62294000 | 1.57382500  | -0.36262900 | H        | -2.99205900 | -1.10912100 | -0.20636200 |
| H         | -1.41268300 | 1.04075200  | -0.01436800 | O        | 3.19937700  | -0.00165600 | 0.24782000  |
| C         | 0.61432700  | 1.15187300  | 0.24847700  | H        | 3.83430700  | -0.45786800 | -0.30256400 |
| H         | 1.44372400  | 1.74916500  | -0.13121900 | H        | 2.55634200  | -0.66818100 | 0.53190200  |
| C         | 0.92173300  | -0.29457500 | -0.04127500 | <b>C</b> |             |             |             |
| O         | 0.12565300  | -1.14545300 | -0.34545100 | N        | 1.43162000  | -0.97588800 | 0.70446700  |
| O         | 2.22028800  | -0.56853400 | 0.12767900  | C        | 2.37781700  | -0.92312000 | -0.40711800 |
| H         | 2.33550800  | -1.51464400 | -0.01207100 | C        | 0.63195500  | 0.23928700  | 0.69889600  |
| H         | -0.79155600 | 2.54900300  | -0.16778900 | H        | 1.94083400  | -1.26574900 | -1.35510500 |
| O         | -2.61239000 | -0.70847100 | 0.30707600  | H        | 3.25155100  | -1.53968900 | -0.19513300 |
| H         | -1.75685700 | -1.04035200 | 0.00452300  | C        | 2.70531600  | 0.55947000  | -0.49513700 |
| H         | -3.19515600 | -0.79986800 | -0.44489700 | C        | 1.33684700  | 1.20594100  | -0.28521900 |
| H         | 0.65282700  | 1.23503800  | 1.34657500  | H        | 0.59749100  | 0.68241200  | 1.69855600  |
| <b>3b</b> |             |             |             | C        | -0.80645000 | 0.00549600  | 0.29131300  |
| N         | -0.79814200 | 1.33852800  | -0.01640700 | H        | 3.16155200  | 0.83974300  | -1.44293400 |
| H         | -1.49607100 | 0.51760700  | -0.02246500 | H        | 3.38683500  | 0.83569700  | 0.31051800  |
| C         | 0.60368100  | 1.17665100  | 0.00774400  | H        | 0.79468600  | 1.24113900  | -1.23155400 |
| H         | 1.05129500  | 1.71726500  | -0.84013800 | H        | 1.38297000  | 2.22017500  | 0.10294400  |
| C         | 1.00229600  | -0.29262400 | -0.00414200 | O        | -1.23303100 | -1.05885900 | -0.10517900 |
| O         | 0.20565200  | -1.18323000 | -0.02385400 | O        | -1.55142400 | 1.09311800  | 0.41517100  |
| O         | 2.31370700  | -0.40034400 | 0.01089300  | H        | -2.46588400 | 0.88236300  | 0.12657500  |
| H         | 2.57269200  | -1.33131900 | 0.00474400  | H        | 0.83945100  | -1.79230000 | 0.66320000  |
| H         | -1.16834100 | 2.28493100  | -0.02098900 | O        | -3.80464300 | -0.10562900 | -0.54522100 |
| O         | -2.56079000 | -0.59449600 | 0.03971300  | H        | -3.14340600 | -0.81372800 | -0.54411900 |
| H         | -2.18942300 | -1.47777700 | -0.00516000 | H        | -4.52754700 | -0.41033200 | 0.00120600  |
| H         | -3.50162900 | -0.64832800 | -0.12933500 | <b>D</b> |             |             |             |
| H         | 1.01406000  | 1.68831600  | 0.89255600  | N        | -0.08245200 | 2.53764400  | -0.16428800 |
| <b>A</b>  |             |             |             | H        | 0.05261500  | 2.58324100  | -1.16559600 |
| N         | 2.58327000  | -0.51517400 | 0.00472900  | C        | -0.43798800 | 1.18509600  | 0.24247500  |
| H         | 2.43694300  | -1.11561800 | 0.80415300  | H        | -0.69648700 | 1.20832300  | 1.30009800  |
| C         | 1.63232800  | 0.56696500  | 0.00914200  | C        | -1.59530800 | 0.56831400  | -0.55660500 |
| C         | 0.16846000  | 0.16705000  | 0.00065600  | C        | 0.83592200  | 0.36726100  | 0.08905400  |
| H         | 1.78994400  | 1.20232500  | 0.88341900  | H        | -2.45356000 | 1.23273600  | -0.47749000 |
| H         | 1.79630600  | 1.21450400  | -0.85477600 | H        | -1.29953500 | 0.49246700  | -1.60415600 |
| O         | -0.21667300 | -0.98146400 | -0.00497100 | C        | -2.02439300 | -0.77997800 | -0.00334900 |
| O         | -0.63977600 | 1.21699800  | 0.00034700  | O        | 1.20684900  | -0.06436900 | -0.98669800 |
| H         | -1.56872200 | 0.89951400  | -0.00855800 | O        | -2.87687000 | -0.88030300 | 0.85285200  |
| H         | 2.45041200  | -1.09669300 | -0.81089000 | N        | -1.36883100 | -1.85130400 | -0.51805800 |
| O         | -2.90875800 | -0.29525600 | -0.08497200 | H        | -1.54296900 | -2.75365200 | -0.11407700 |
| H         | -3.47631800 | -0.47532200 | 0.66294300  | H        | -0.58690600 | -1.73280600 | -1.13622200 |
| H         | -2.19452300 | -0.94880600 | -0.05142000 | O        | 1.49998500  | 0.20492000  | 1.21169300  |
| <b>B</b>  |             |             |             | H        | 2.33246300  | -0.28225700 | 1.01968900  |
| N         | -1.99723700 | -1.18672100 | -0.35952200 | H        | -0.81386500 | 3.18796100  | 0.08327200  |
| H         | -1.60284400 | -1.74664600 | 0.38507600  | O        | 3.55624300  | -1.14734600 | 0.05499500  |
| C         | -1.37581100 | 0.12341500  | -0.37142000 | H        | 2.99476000  | -0.92656700 | -0.70143300 |
| H         | -1.51791000 | 0.57939500  | -1.35290600 | H        | 4.41339700  | -0.76120500 | -0.11984700 |
| C         | -1.89606100 | 1.09688900  | 0.69712900  | <b>E</b> |             |             |             |
| C         | 0.11477500  | -0.04382400 | -0.16770300 | N        | -3.02377800 | -0.28964700 | 0.43858900  |
| H         | -1.73044000 | 0.68737300  | 1.69477500  | H        | -3.45788600 | -1.18205300 | 0.24778300  |
| H         | -1.40455600 | 2.06739600  | 0.62716700  | C        | -1.82338800 | -0.12173800 | -0.36163200 |
| H         | -2.96738900 | 1.24694500  | 0.56059900  | H        | -2.06385600 | -0.33503200 | -1.40306900 |
| O         | 0.60194800  | -0.96565800 | 0.45037900  | C        | -1.35791400 | 1.33650500  | -0.24997800 |
|           |             |             |             | C        | -0.68727100 | -1.04598600 | 0.05832900  |



|          |             |             |             |          |             |             |             |
|----------|-------------|-------------|-------------|----------|-------------|-------------|-------------|
| H        | -2.14391600 | 1.95026000  | -0.68772800 | C        | -2.21482600 | 0.85890100  | 0.45604600  |
| H        | -1.32271200 | 1.59174000  | 0.81216600  | C        | -2.11751400 | -1.32292500 | -0.58285100 |
| C        | -0.01746300 | 1.65601200  | -0.92900100 | H        | -1.69190700 | 2.51114000  | 1.67005100  |
| O        | -0.32145100 | -1.14122600 | 1.20878900  | C        | -3.41877400 | 1.15623600  | -0.17680000 |
| H        | 0.07565700  | 1.12263900  | -1.87326800 | C        | -3.30884500 | -1.03350000 | -1.21238600 |
| H        | 0.01736300  | 2.72452900  | -1.15221500 | H        | -1.62936200 | -2.27627100 | -0.74188900 |
| C        | 1.22890900  | 1.33395600  | -0.11987200 | H        | -3.91908300 | 2.10342200  | -0.02224700 |
| O        | 2.10045300  | 0.58408000  | -0.52602400 | C        | -3.95264300 | 0.19647600  | -1.01064900 |
| N        | 1.34468800  | 1.97544100  | 1.06404200  | H        | -3.75838400 | -1.76262900 | -1.87297300 |
| H        | 2.11328500  | 1.73372400  | 1.66258900  | H        | -4.88672800 | 0.39508900  | -1.51903200 |
| H        | 0.59181700  | 2.51249900  | 1.44888100  | O        | 1.83375800  | 0.44281600  | -1.44619600 |
| O        | -0.13272400 | -1.68009900 | -0.95718900 | H        | 2.30220900  | 1.30237200  | -1.52004500 |
| H        | 0.72797500  | -2.06798500 | -0.65721600 | H        | 3.03833300  | -2.74216600 | -0.78322900 |
| H        | -2.77530800 | -0.28776500 | 1.42053500  | O        | 3.48733500  | 2.58894300  | -1.06582300 |
| O        | 2.29039100  | -2.15836300 | 0.07916400  | H        | 3.63745900  | 2.00610700  | -0.30517600 |
| H        | 2.49592700  | -1.23591000 | -0.13589200 | H        | 3.19341300  | 3.42637800  | -0.71088600 |
| H        | 1.94469700  | -2.11483300 | 0.97402300  |          |             |             |             |
| <b>F</b> |             |             |             | <b>H</b> |             |             |             |
| N        | -2.71326800 | -0.88487200 | -1.08237600 | N        | 2.37400300  | -2.28561500 | -0.03773900 |
| H        | -2.89618800 | 0.04814200  | -1.42780400 | H        | 2.78656500  | -2.02447900 | 0.84855800  |
| C        | -1.40401400 | -0.94783600 | -0.44998100 | C        | 1.21329200  | -1.45596900 | -0.30556500 |
| H        | -1.21133200 | -1.98277600 | -0.17158600 | H        | 0.86726400  | -1.64746400 | -1.32115800 |
| C        | -0.24005400 | -0.43288000 | -1.31469100 | C        | 0.03852300  | -1.66885700 | 0.67693500  |
| C        | -1.52234000 | -0.14933500 | 0.83564300  | C        | 1.65699900  | -0.00751500 | -0.22947300 |
| H        | -0.20005500 | -1.06217800 | -2.20550400 | H        | -0.25736700 | -2.71765500 | 0.60359200  |
| H        | -0.47156000 | 0.57941300  | -1.65239000 | H        | 0.41520100  | -1.50404000 | 1.68806000  |
| C        | 1.08036800  | -0.44557300 | -0.62014900 | C        | -1.14241600 | -0.77647000 | 0.40766600  |
| O        | -1.62833200 | 1.05437400  | 0.88358500  | O        | 2.23959100  | 0.43695700  | 0.73829300  |
| N        | 1.66630500  | 0.69194700  | -0.12779700 | C        | -1.32859800 | 0.39521900  | 1.13385900  |
| C        | 1.93570400  | -1.45699400 | -0.27901600 | C        | -2.04394300 | -1.07950400 | -0.60804900 |
| H        | 1.27712800  | 1.62585800  | -0.21177700 | H        | -0.63277300 | 0.64343400  | 1.92626700  |
| C        | 2.82200400  | 0.32263500  | 0.46973000  | C        | -2.38881000 | 1.24369100  | 0.85279700  |
| N        | 3.01917100  | -0.96875900 | 0.39964700  | C        | -3.10394300 | -0.23437600 | -0.89292900 |
| H        | 1.83110800  | -2.50883700 | -0.49209900 | H        | -1.91451200 | -1.98997400 | -1.18142800 |
| H        | 3.48403200  | 1.03464000  | 0.93536000  | H        | -2.52203000 | 2.14844700  | 1.43156100  |
| O        | -1.53708500 | -0.90384200 | 1.92606500  | C        | -3.27911200 | 0.93187000  | -0.16272100 |
| H        | -1.63568300 | -0.32200900 | 2.68853100  | H        | -3.79614600 | -0.48702700 | -1.68531200 |
| H        | -2.76080700 | -1.52146000 | -1.86463500 | H        | -4.10787700 | 1.59165200  | -0.38223400 |
| O        | -0.11789500 | 2.93045500  | -0.50315400 | O        | 1.32469800  | 0.70965600  | -1.28397400 |
| H        | -0.19363300 | 3.83170800  | -0.19616500 | H        | 1.59454800  | 1.64175500  | -1.12684800 |
| H        | -0.79197400 | 2.42129700  | -0.02942600 | H        | 2.11170000  | -3.25973600 | 0.01319600  |
|          |             |             |             | O        | 2.29890400  | 3.03747500  | -0.25042500 |
| <b>G</b> |             |             |             | H        | 2.49434300  | 2.37477800  | 0.42878700  |
| N        | 2.51690000  | -2.58499400 | 0.06794600  | H        | 1.70557800  | 3.66837700  | 0.15486300  |
| H        | 3.18470100  | -2.34190300 | 0.78885500  |          |             |             |             |
| C        | 1.55716800  | -1.50742400 | -0.09796900 | <b>I</b> |             |             |             |
| H        | 0.92824900  | -1.72868200 | -0.95965200 | N        | 3.00350900  | -2.00056200 | -0.15218900 |
| C        | 0.68073600  | -1.40294500 | 1.15822100  | H        | 3.40144400  | -1.72237800 | 0.73572500  |
| C        | 2.22983500  | -0.16285900 | -0.34054300 | C        | 1.72963900  | -1.33079700 | -0.35107300 |
| H        | 0.22449000  | -2.38245000 | 1.30950900  | H        | 1.37457000  | -1.53748900 | -1.36060800 |
| H        | 1.33442200  | -1.21520100 | 2.01268700  | C        | 0.63289000  | -1.73191900 | 0.66139000  |
| C        | -0.35963300 | -0.33718300 | 1.06872300  | C        | 1.97766600  | 0.16087500  | -0.23948300 |
| O        | 3.06444400  | 0.29414800  | 0.41512400  | H        | 0.49969100  | -2.81297400 | 0.57871400  |
| C        | -0.34952000 | 0.87447700  | 1.68819900  | H        | 1.01380100  | -1.52721600 | 1.66401100  |
| C        | -1.55138300 | -0.36865800 | 0.26703500  | O        | -0.67947400 | -1.02914600 | 0.44534900  |
| H        | 0.37884700  | 1.28132400  | 2.37059100  | C        | 2.53911700  | 0.64957400  | 0.71998500  |
| N        | -1.45812300 | 1.60108600  | 1.32583200  | C        | -0.99322800 | 0.13288000  | 1.13843600  |
|          |             |             |             | C        | -1.59345500 | -1.49188800 | -0.49730700 |

|          |             |             |             |          |             |             |             |
|----------|-------------|-------------|-------------|----------|-------------|-------------|-------------|
| H        | -0.29841300 | 0.51932600  | 1.87426800  | H        | -0.20944700 | 1.26228600  | 1.48827000  |
| C        | -2.17617700 | 0.81496500  | 0.90195100  | C        | -1.13684500 | 0.97760600  | -0.43859500 |
| C        | -2.77880900 | -0.82532700 | -0.74462600 | C        | 1.22384100  | 0.43045500  | 0.15268300  |
| H        | -1.37500000 | -2.39763600 | -1.05096000 | H        | -1.93599400 | 1.69405400  | -0.26241900 |
| H        | -2.39903300 | 1.72044100  | 1.45464900  | H        | -0.84749100 | 1.00980700  | -1.48740400 |
| C        | -3.07317000 | 0.33705900  | -0.04337700 | O        | 1.94498100  | 0.56867600  | -0.81065300 |
| H        | -3.48559600 | -1.19199200 | -1.47611500 | O        | 1.33617900  | -0.54862200 | 1.03016400  |
| O        | -4.24887900 | 0.95908800  | -0.31918500 | H        | 2.07233100  | -1.13888000 | 0.74979400  |
| H        | -4.33016500 | 1.74698400  | 0.21758000  | H        | -0.23948900 | 3.37919500  | 0.24257900  |
| O        | 1.50816900  | 0.86179300  | -1.25246600 | O        | 3.41135100  | -1.74077600 | -0.24860700 |
| H        | 1.66991500  | 1.81454200  | -1.07653500 | H        | 4.31652900  | -1.67165800 | 0.05178800  |
| H        | 2.87718100  | -3.00273900 | -0.13649400 | H        | 3.24734400  | -0.96287700 | -0.80048300 |
| O        | 2.22727600  | 3.25928600  | -0.15036300 | Se       | -1.83702600 | -0.81293600 | -0.01387100 |
| H        | 2.99577300  | 3.74866000  | -0.44039800 | H        | -3.01792100 | -0.65619300 | -0.86703300 |
| H        | 2.55051800  | 2.58827300  | 0.47015600  |          |             |             |             |
| <b>J</b> |             |             |             | <b>M</b> |             |             |             |
| N        | 1.42024200  | 1.87529500  | -0.14487000 | N        | 1.09260200  | 1.81537600  | -0.01962000 |
| H        | 1.03585200  | 2.19105200  | 0.73382300  | H        | 0.83839200  | 1.87766600  | 0.95650800  |
| C        | 1.13148400  | 0.48005700  | -0.38836500 | C        | 0.70519800  | 0.53176400  | -0.55268700 |
| H        | 1.40940100  | 0.22896500  | -1.41478900 | H        | 0.80742200  | 0.54854500  | -1.64104600 |
| C        | 1.88844600  | -0.50578600 | 0.53327800  | C        | 1.50070900  | -0.69503900 | -0.05610800 |
| C        | -0.34378400 | 0.17083500  | -0.26910000 | C        | -0.76571100 | 0.29852200  | -0.25652100 |
| H        | 2.94239800  | -0.22298700 | 0.52144900  | H        | 1.07719100  | -1.57412500 | -0.55373300 |
| H        | 1.52604500  | -0.37914900 | 1.56410300  | C        | 2.97980800  | -0.60199100 | -0.39057100 |
| O        | 1.81431900  | -1.83926100 | 0.11454300  | O        | 1.28486700  | -0.77588500 | 1.34126100  |
| O        | -0.78998800 | -0.92122200 | -0.57658200 | O        | -1.40149100 | 0.93122100  | 0.55245400  |
| H        | 0.90162800  | -2.02051500 | -0.13043600 | H        | 3.44271000  | 0.24541900  | 0.11614500  |
| O        | -1.07840000 | 1.13061900  | 0.25152600  | H        | 3.49885200  | -1.50546600 | -0.06620800 |
| H        | -2.00626500 | 0.80955200  | 0.32870200  | H        | 3.13184900  | -0.49956600 | -1.46603000 |
| H        | 2.41644900  | 2.03818200  | -0.13752500 | H        | 1.71782700  | -1.55688800 | 1.68187300  |
| O        | -3.39740500 | -0.25397500 | 0.15842800  | O        | -1.27110000 | -0.69606300 | -0.97619400 |
| H        | -2.77486900 | -0.90703900 | -0.19052700 | H        | -2.20872900 | -0.82105200 | -0.71406800 |
| H        | -3.83742300 | -0.66506100 | 0.90108200  | H        | 2.08671700  | 1.96312700  | -0.10373100 |
|          |             |             |             | O        | -3.72344500 | -0.53937100 | 0.21220500  |
| <b>K</b> |             |             |             | H        | -4.47175400 | -0.10909200 | -0.19884800 |
| N        | -0.65316800 | 2.37606500  | 0.15662200  | H        | -3.19936800 | 0.16505400  | 0.62400400  |
| H        | -0.36379500 | 2.54239200  | -0.79844800 |          |             |             |             |
| C        | -0.72466600 | 0.94811900  | 0.41543800  | <b>N</b> |             |             |             |
| H        | -0.94187400 | 0.79537800  | 1.47253000  | N        | 1.53448200  | 2.58594400  | 0.07957800  |
| C        | -1.77590000 | 0.22744100  | -0.43861100 | H        | 1.85997700  | 2.48362000  | -0.87292700 |
| C        | 0.65503100  | 0.37836500  | 0.12336400  | C        | 0.81832300  | 1.39099200  | 0.48559800  |
| H        | -2.73509700 | 0.72261500  | -0.29299600 | H        | 0.67627000  | 1.41215600  | 1.56709600  |
| H        | -1.48881800 | 0.30223200  | -1.48658400 | C        | -0.55525300 | 1.21990800  | -0.19372200 |
| S        | -1.91407200 | -1.52706400 | 0.03498300  | C        | 1.69125100  | 0.19602900  | 0.15740400  |
| O        | 1.19260800  | 0.53163100  | -0.95233200 | H        | -1.12915500 | 2.12670600  | 0.01242700  |
| H        | -2.66326300 | -1.90259200 | -1.00696200 | H        | -0.40546300 | 1.17256200  | -1.27488200 |
| O        | 1.18898300  | -0.27576700 | 1.13445500  | C        | -1.34321100 | 0.00768900  | 0.28259200  |
| H        | 2.06849400  | -0.61799800 | 0.85708500  | O        | 2.30748100  | 0.10427600  | -0.88203200 |
| H        | -1.55151000 | 2.81437800  | 0.30000000  | H        | -0.84074100 | -0.91848900 | 0.00021800  |
| O        | 3.45729600  | -0.92112800 | -0.22491100 | H        | -1.43397200 | 0.01811600  | 1.37064700  |
| H        | 4.28225400  | -0.45622600 | -0.09214600 | S        | -2.99598300 | 0.02185900  | -0.45130700 |
| H        | 2.95305100  | -0.40104800 | -0.86740000 | C        | -3.64816700 | -1.49401300 | 0.26702900  |
|          |             |             |             | H        | -3.66968400 | -1.43500800 | 1.35468000  |
| <b>L</b> |             |             |             | H        | -4.66644300 | -1.61249300 | -0.09810900 |
| N        | 0.52540500  | 2.72158400  | 0.19885300  | H        | -3.06164300 | -2.35857600 | -0.04205100 |
| H        | 0.95543200  | 2.78508400  | -0.71469300 | O        | 1.67695900  | -0.74306100 | 1.08895000  |
| C        | 0.06294900  | 1.36755600  | 0.43791300  | H        | 2.22805400  | -1.49680300 | 0.78133500  |
|          |             |             |             | H        | 0.93090200  | 3.39457500  | 0.12175500  |

|   |            |             |             |
|---|------------|-------------|-------------|
| O | 3.34002300 | -2.40442900 | -0.28074100 |
| H | 3.25419800 | -1.64302000 | -0.87296300 |
| H | 3.07867900 | -3.17261100 | -0.78618100 |

|   |             |             |             |
|---|-------------|-------------|-------------|
| H | -0.58975600 | -2.19801700 | 0.26872000  |
| O | 1.92135100  | 1.21254600  | -0.25604700 |
| O | 2.21501000  | -1.00559200 | 0.00656000  |
| H | 3.12708000  | -0.83144600 | -0.26223900 |
| H | -0.21666800 | 1.96326100  | 0.22552400  |

*Amino Acid Radical Cations*

**Gly I**

|   |             |             |             |
|---|-------------|-------------|-------------|
| N | 1.80653800  | 0.08806600  | -0.00262200 |
| H | 2.76615900  | -0.24758900 | -0.00916900 |
| C | 0.69230500  | -0.77064400 | 0.00296900  |
| C | -0.55954600 | 0.10741700  | 0.00022400  |
| H | 0.73768800  | -1.45372000 | -0.86060500 |
| H | 0.73764200  | -1.43838300 | 0.87927900  |
| O | -0.45653500 | 1.29939300  | 0.00146200  |
| O | -1.64860600 | -0.61690800 | -0.00230300 |
| H | -2.43514500 | -0.05345900 | -0.00344600 |
| H | 1.59246900  | 1.09617800  | -0.00014100 |

**Gly II**

|   |             |             |             |
|---|-------------|-------------|-------------|
| N | 1.78311200  | 0.13474700  | -0.21557400 |
| H | 2.24076900  | -0.10779900 | -1.08535100 |
| C | 0.80920900  | -0.67227100 | 0.32924800  |
| C | -0.67161500 | -0.07496100 | 0.01114200  |
| H | 0.83102800  | -1.68575300 | -0.05485900 |
| H | 0.80930800  | -0.63834100 | 1.42451200  |
| O | -1.55677300 | -0.81897300 | -0.20048300 |
| O | -0.64693500 | 1.23347800  | 0.08361600  |
| H | -1.53347300 | 1.60238500  | -0.04733300 |
| H | 1.97468500  | 1.05362700  | 0.16464300  |

**Ala**

|   |             |             |             |
|---|-------------|-------------|-------------|
| N | 1.27340000  | 1.09239800  | -0.44188300 |
| H | 1.46029300  | 1.57078300  | 0.43086600  |
| C | 0.73222300  | -0.17621600 | -0.44941700 |
| H | 0.75455000  | -0.60275100 | -1.44841200 |
| C | 1.27678300  | -1.11663700 | 0.62990400  |
| C | -0.86946000 | -0.04386200 | -0.10880900 |
| H | 1.21079000  | -0.66998600 | 1.62140800  |
| H | 0.71376100  | -2.04701800 | 0.61723000  |
| H | 2.31903300  | -1.33249400 | 0.40103000  |
| O | -1.63008200 | -0.76518500 | -0.64269000 |
| O | -1.06708500 | 0.87901500  | 0.80226600  |
| H | -2.00146800 | 0.91167200  | 1.05602900  |
| H | 1.36929800  | 1.63265300  | -1.29165700 |

**Pro**

|   |             |             |             |
|---|-------------|-------------|-------------|
| N | -0.67890500 | 1.05396300  | 0.24134900  |
| C | -2.02272100 | 0.80750200  | -0.17953500 |
| C | 0.08739300  | -0.13305000 | 0.46694300  |
| H | -2.09393400 | 1.14879800  | -1.22490500 |
| H | -2.71713800 | 1.43511400  | 0.38719400  |
| C | -2.18265100 | -0.70609100 | -0.03422900 |
| C | -0.75175200 | -1.23319900 | -0.20054100 |
| H | 0.11944300  | -0.29672100 | 1.55807200  |
| C | 1.52825900  | 0.11731100  | 0.01778600  |
| H | -2.86932900 | -1.11123800 | -0.77128600 |
| H | -2.57096000 | -0.94416200 | 0.95580200  |
| H | -0.47845400 | -1.31380400 | -1.25297600 |

**Asn**

|   |             |             |             |
|---|-------------|-------------|-------------|
| N | -0.13655100 | 1.51055500  | -0.28182600 |
| H | -0.42075800 | 1.92501500  | 0.59934100  |
| C | -0.49651500 | 0.14138400  | -0.51611100 |
| H | -0.47173400 | -0.05845600 | -1.58496600 |
| C | 0.50425100  | -0.76795100 | 0.21900200  |
| C | -1.90431200 | -0.10862100 | 0.04546200  |
| H | 0.28273400  | -0.78997700 | 1.29009900  |
| H | 0.45455300  | -1.78932600 | -0.15285500 |
| C | 1.87940100  | -0.15569400 | 0.07373900  |
| O | -2.39119700 | 0.58968900  | 0.88235400  |
| O | 1.97915200  | 1.06741100  | -0.09861000 |
| N | 2.94222400  | -0.93452800 | 0.17417800  |
| H | 3.86400500  | -0.52979600 | 0.13513700  |
| H | 2.85994500  | -1.92525700 | 0.31786100  |
| O | -2.43402100 | -1.19610900 | -0.48689300 |
| H | -3.30599700 | -1.35451000 | -0.10162900 |
| H | -0.03087200 | 2.14747600  | -1.05680700 |

**Gln**

|   |             |             |             |
|---|-------------|-------------|-------------|
| N | 1.94633400  | 1.76973500  | 0.16064200  |
| H | 2.66633600  | 1.71181500  | -0.56432800 |
| C | 1.26623600  | 0.59517200  | 0.48618700  |
| H | 1.05161600  | 0.55517600  | 1.55656200  |
| C | -0.15711800 | 0.66188800  | -0.24644600 |
| C | 2.10539300  | -0.57155600 | -0.03273000 |
| H | -0.61952400 | 1.61687800  | 0.00515100  |
| H | 0.02850700  | 0.63617900  | -1.31909800 |
| C | -1.08688700 | -0.44852400 | 0.20934000  |
| O | 2.94339200  | -0.40055000 | -0.86933200 |
| H | -0.87737600 | -1.38959300 | -0.29535700 |
| H | -0.99827700 | -0.62648900 | 1.28307200  |
| C | -2.53602800 | 0.02221800  | -0.02773900 |
| O | -2.81928500 | 1.19696600  | 0.01560200  |
| N | -3.42643100 | -0.96189600 | -0.24043900 |
| H | -4.39615700 | -0.71639500 | -0.34339800 |
| H | -3.17051400 | -1.93049200 | -0.26300500 |
| O | 1.76712800  | -1.71017100 | 0.53335300  |
| H | 2.31360500  | -2.42609800 | 0.18185800  |
| H | 1.68300200  | 2.66899600  | 0.54846800  |

**His**

|   |             |             |             |
|---|-------------|-------------|-------------|
| N | -0.50741000 | 1.39059500  | 0.45727300  |
| H | -0.76969800 | 2.31111300  | 0.13267500  |
| C | -1.08787600 | 0.32720500  | -0.33999800 |
| H | -1.06260200 | 0.60999200  | -1.39233100 |
| C | -0.20723000 | -0.91531600 | -0.12386100 |
| C | -2.53163000 | 0.00926200  | 0.04220600  |
| H | -0.44773200 | -1.38645200 | 0.83193200  |
| H | -0.35374500 | -1.66878100 | -0.90166500 |
| C | 1.19926400  | -0.45375400 | -0.10237800 |
| O | -3.02059500 | 0.35288100  | 1.07734900  |

|            |             |             |             |            |             |             |             |
|------------|-------------|-------------|-------------|------------|-------------|-------------|-------------|
| N          | 2.16759600  | -0.93183300 | 0.68958900  | C          | 3.68730500  | 0.06258800  | 0.24826300  |
| C          | 1.86296000  | 0.56676500  | -0.87807400 | H          | 3.63699100  | -2.00013400 | -0.35960600 |
| H          | 2.06436300  | -1.65667900 | 1.38300300  | H          | 4.73464500  | 0.03193800  | 0.51680400  |
| C          | 3.32164700  | -0.24074600 | 0.41439800  | O          | -3.06988600 | 1.44830300  | 0.01505300  |
| N          | 3.13999200  | 0.66236700  | -0.53240100 | H          | -3.95655000 | 1.59621200  | -0.33854400 |
| H          | 1.42123500  | 1.17153100  | -1.65354000 | H          | -0.56751000 | -1.74497500 | 1.56244800  |
| H          | 4.25043400  | -0.43732000 | 0.92819900  |            |             |             |             |
| O          | -3.13188600 | -0.72102600 | -0.89269200 | <b>Tyr</b> |             |             |             |
| H          | -4.03185800 | -0.92354100 | -0.60795000 | N          | 1.50127700  | -1.55422100 | -0.72756700 |
| H          | -0.79459600 | 1.31689700  | 1.42742600  | H          | 2.15915100  | -2.12876000 | -0.21295000 |
|            |             |             |             | C          | 1.73180400  | -0.16620800 | -0.42954100 |
| <b>Trp</b> |             |             |             | H          | 1.42732400  | 0.45322800  | -1.27418400 |
| N          | -3.20683000 | 1.61564800  | 0.48685700  | C          | 0.90086100  | 0.26953400  | 0.82484800  |
| H          | -3.86577900 | 1.17155000  | 1.10719700  | C          | 3.19863700  | 0.14937400  | -0.12404500 |
| C          | -2.08432000 | 0.81193100  | 0.13469800  | H          | 1.16341900  | -0.40626800 | 1.64027400  |
| H          | -1.44557600 | 1.40383100  | -0.52957500 | H          | 1.17774000  | 1.28565500  | 1.10140100  |
| C          | -1.19899600 | 0.34196900  | 1.34013500  | C          | -0.54497300 | 0.18553500  | 0.52567900  |
| C          | -2.48091500 | -0.40380900 | -0.70550100 | O          | 4.00895400  | -0.68593900 | 0.14663500  |
| H          | -0.96268000 | 1.23905400  | 1.91338000  | C          | -1.25112300 | 1.34016600  | 0.08504600  |
| H          | -1.79130100 | -0.31541400 | 1.97646200  | C          | -1.23595300 | -1.05307500 | 0.62017200  |
| C          | 0.05099300  | -0.32012500 | 0.92009700  | H          | -0.72043500 | 2.27998500  | 0.00867400  |
| O          | -1.81933400 | -1.41315400 | -0.75636300 | C          | -2.57054400 | 1.27821400  | -0.22864300 |
| C          | 0.29338500  | -1.72495000 | 0.92228500  | C          | -2.55495600 | -1.13862200 | 0.31177800  |
| C          | 1.21177700  | 0.26917600  | 0.36428500  | H          | -0.68925600 | -1.92912600 | 0.93484600  |
| H          | -0.36333300 | -2.51003800 | 1.25836000  | H          | -3.11352000 | 2.15603900  | -0.55585000 |
| N          | 1.48647400  | -1.97398200 | 0.41895900  | C          | -3.24510400 | 0.02968800  | -0.11754500 |
| C          | 2.10787800  | -0.77063800 | 0.04642200  | H          | -3.10615900 | -2.06618000 | 0.37727900  |
| C          | 1.58117500  | 1.59470000  | 0.10281400  | O          | -4.51055600 | -0.11209900 | -0.39852900 |
| H          | 1.88298700  | -2.89223400 | 0.30358000  | H          | -4.93296500 | 0.70658000  | -0.68388500 |
| C          | 3.33673600  | -0.55244400 | -0.51613000 | O          | 3.44337600  | 1.46058900  | -0.17139000 |
| C          | 2.81863900  | 1.83273300  | -0.46702300 | H          | 4.37194700  | 1.60870700  | 0.04444300  |
| H          | 0.91887500  | 2.41476600  | 0.34555200  | H          | 1.64772400  | -1.74836000 | -1.70730500 |
| H          | 4.01667500  | -1.35780700 | -0.75609800 |            |             |             |             |
| C          | 3.67912200  | 0.77951400  | -0.77130100 | <b>Ser</b> |             |             |             |
| H          | 3.12735000  | 2.84626700  | -0.67857500 | N          | 0.40630500  | 1.60126800  | -0.36169600 |
| H          | 4.64116000  | 0.99443100  | -1.21551700 | H          | -0.17525500 | 2.12072800  | 0.29097300  |
| O          | -3.59238400 | -0.22988500 | -1.39303600 | C          | 0.16095900  | 0.27616600  | -0.52276500 |
| H          | -3.75060900 | -1.02147700 | -1.92206000 | H          | 0.43022400  | -0.11432400 | -1.50199300 |
| H          | -2.96436900 | 2.53138200  | 0.82707900  | C          | 1.23321200  | -0.64434600 | 0.51023300  |
|            |             |             |             | C          | -1.23228600 | -0.07720600 | -0.00835700 |
| <b>Phe</b> |             |             |             | H          | 1.02269200  | -0.24275600 | 1.49785000  |
| N          | -1.32068200 | -1.42135400 | 0.97943800  | H          | 0.86110100  | -1.65724100 | 0.35488900  |
| H          | -1.98843300 | -2.08970800 | 0.61640300  | O          | 2.50637400  | -0.42146800 | 0.15695000  |
| C          | -1.40467600 | -0.12669500 | 0.55834900  | O          | -1.81434600 | 0.64677100  | 0.74036800  |
| H          | -1.04906900 | 0.59882500  | 1.28417500  | H          | 2.83182400  | -1.06997900 | -0.47352900 |
| C          | -0.40403500 | 0.18535200  | -0.81428100 | O          | -1.62630300 | -1.24701000 | -0.47044600 |
| C          | -2.80765900 | 0.15295700  | 0.02196700  | H          | -2.50609100 | -1.45909800 | -0.13013600 |
| H          | -0.71741600 | -0.56771200 | -1.53213200 | H          | 1.19426100  | 2.05977600  | -0.79583000 |
| H          | -0.74568500 | 1.18047300  | -1.09252600 |            |             |             |             |
| C          | 0.99757100  | 0.13440500  | -0.44630500 | <b>Cys</b> |             |             |             |
| O          | -3.52392800 | -0.72516400 | -0.35325100 | N          | 0.46235100  | 1.92110000  | -0.28641200 |
| C          | 1.63668800  | 1.28409700  | 0.06019600  | H          | 0.53436500  | 1.77400200  | -1.28568900 |
| C          | 1.73389500  | -1.05723000 | -0.57809700 | C          | 0.50202100  | 0.84391800  | 0.54425100  |
| H          | 1.07381900  | 2.20326500  | 0.16730400  | H          | 0.85444300  | 1.09095100  | 1.54397500  |
| C          | 2.97122500  | 1.24816300  | 0.39578500  | C          | -1.06277700 | 0.22474800  | 0.94641000  |
| C          | 3.06679400  | -1.08938300 | -0.24219100 | C          | 1.23236600  | -0.32387500 | -0.11282700 |
| H          | 1.24872100  | -1.94435600 | -0.96624000 | H          | -0.82830300 | -0.47125900 | 1.74778400  |
| H          | 3.46313100  | 2.13501200  | 0.76931100  | H          | -1.58801600 | 1.10105100  | 1.31387800  |

|            |             |             |             |           |             |             |             |
|------------|-------------|-------------|-------------|-----------|-------------|-------------|-------------|
| S          | -1.95525600 | -0.49117200 | -0.35569600 | H         | -4.86641800 | -0.23206700 | -0.19510600 |
| O          | 1.33483400  | -0.41585800 | -1.29783400 | H         | -3.93215900 | -0.80200800 | 1.21939800  |
| H          | -1.42881000 | -1.72401900 | -0.28795300 | O         | 2.94419600  | -1.32630300 | 0.51689400  |
| O          | 1.66454400  | -1.18193800 | 0.79464900  | H         | 3.75892100  | -1.62852500 | 0.09685000  |
| H          | 2.13923000  | -1.90486000 | 0.36313000  | H         | 1.37759800  | 2.34374200  | 0.92806200  |
| H          | 0.34003800  | 2.85879900  | 0.05938100  |           |             |             |             |
| <b>Sel</b> |             |             |             | <b>4a</b> |             |             |             |
| N          | 1.14627700  | 1.70444900  | -0.78278300 | N         | 2.26758100  | -0.86241300 | -0.26050000 |
| H          | 0.82782200  | 1.26850800  | -1.63665500 | H         | 1.99245000  | -1.76534200 | 0.10054300  |
| C          | 1.06080000  | 0.88041200  | 0.39376500  | C         | 1.81420000  | 0.29162500  | 0.31895900  |
| H          | 1.73627500  | 1.28345600  | 1.14764500  | C         | 0.18423200  | 0.46752000  | 0.03923400  |
| C          | -0.35068200 | 0.87019200  | 0.99277100  | H         | 1.80043000  | 0.24381800  | 1.41173700  |
| C          | 1.46492700  | -0.55731700 | 0.07892300  | H         | 2.29378100  | 1.18548700  | -0.06116900 |
| H          | -0.37445300 | 0.43373800  | 1.98739000  | O         | -0.19716500 | 1.56162300  | -0.19231900 |
| H          | -0.74072600 | 1.88516700  | 1.01264400  | O         | -0.41337700 | -0.66240500 | 0.16333600  |
| O          | 0.65160400  | -1.38016500 | -0.30715300 | H         | -1.42722000 | -0.56324300 | 0.07080500  |
| O          | 2.74308700  | -0.79773800 | 0.18572400  | H         | 2.73292500  | -0.84900000 | -1.15682600 |
| H          | 2.95062300  | -1.69895600 | -0.09763600 | O         | -2.93009600 | -0.40424500 | -0.01186200 |
| H          | 2.06120700  | 2.10244700  | -0.92786000 | H         | -3.55906800 | -1.12457800 | -0.06344000 |
| Se         | -1.55558200 | -0.16715800 | -0.13652300 | H         | -3.37186100 | 0.39509400  | -0.30054700 |
| H          | -1.80268200 | -1.25861900 | 0.81440900  |           |             |             |             |
| <b>Thr</b> |             |             |             | <b>4b</b> |             |             |             |
| N          | -0.06570600 | 1.88276400  | 0.05631600  | N         | -0.79862300 | 1.33821000  | -0.01809500 |
| H          | -0.40764800 | 1.96651500  | 1.00403100  | H         | -1.16886000 | 2.28460200  | -0.02456500 |
| C          | -0.34201900 | 0.79429000  | -0.63930300 | C         | 0.60328000  | 1.17669900  | 0.00890100  |
| H          | -0.12188100 | 0.78125800  | -1.69757900 | C         | 1.00224100  | -0.29246200 | -0.00442400 |
| C          | 1.24711600  | -0.72885700 | 0.01649400  | H         | 1.05302500  | 1.71947900  | -0.83629700 |
| C          | -1.37378400 | -0.10850600 | -0.07117100 | H         | 1.01093000  | 1.68617100  | 0.89638300  |
| H          | 0.64783800  | -1.56124800 | -0.34489800 | O         | 0.20583900  | -1.18329000 | -0.02550700 |
| C          | 2.41822400  | -0.27421600 | -0.75590000 | O         | 2.31363900  | -0.39990100 | 0.01139100  |
| O          | 1.27873900  | -0.50356800 | 1.29809300  | H         | 2.57286100  | -1.33081400 | 0.00454000  |
| O          | -1.61736400 | -0.13228200 | 1.10837400  | H         | -1.49666500 | 0.51699200  | -0.02369600 |
| H          | 2.74863600  | 0.71115200  | -0.43043800 | O         | -2.56041700 | -0.59466100 | 0.04211100  |
| H          | 3.23782000  | -0.97451900 | -0.56039300 | H         | -2.18694200 | -1.47701100 | -0.00471700 |
| H          | 2.22070600  | -0.28697200 | -1.82477200 | H         | -3.49959700 | -0.64949400 | -0.13580400 |
| H          | 0.52397400  | -0.88538100 | 1.76668600  |           |             |             |             |
| O          | -1.91295500 | -0.88821400 | -0.99443700 | <b>4c</b> |             |             |             |
| H          | -2.58270700 | -1.45505100 | -0.59018800 | N         | -2.54067100 | 0.35946800  | -0.01527600 |
| H          | 0.50862000  | 2.62114500  | -0.31361900 | H         | -3.54661100 | 0.22038700  | -0.03147900 |
| <b>Met</b> |             |             |             | C         | -1.60861000 | -0.69180400 | -0.00443500 |
| N          | 1.01408900  | 1.71224500  | 0.23014700  | C         | -0.21396800 | -0.05340300 | 0.01333000  |
| H          | 1.41239700  | 1.96013100  | -0.66887000 | H         | -1.78636900 | -1.34700000 | 0.86362200  |
| C          | 1.25002900  | 0.32452200  | 0.54023500  | H         | -1.76554200 | -1.34704700 | -0.87626400 |
| H          | 1.28069400  | 0.18998500  | 1.62155900  | O         | -0.12982300 | 1.14919700  | 0.02101800  |
| C          | 0.09503900  | -0.52584800 | -0.03790600 | O         | 0.72349500  | -0.93772300 | 0.01763700  |
| C          | 2.56145200  | -0.18779000 | -0.05546200 | H         | 1.63949800  | -0.51352500 | 0.01442900  |
| H          | 0.17656600  | -0.53063900 | -1.12789300 | H         | -2.11528600 | 1.30091400  | -0.00636000 |
| H          | 0.15140400  | -1.55552300 | 0.30948300  | O         | 3.05964700  | 0.14423900  | -0.05675200 |
| C          | -1.20794100 | 0.14929800  | 0.38372500  | H         | 3.18263400  | 1.08467800  | 0.07438600  |
| O          | 3.13319400  | 0.36102400  | -0.95048400 | H         | 3.88528400  | -0.28913900 | 0.16000700  |
| H          | -1.46663000 | 0.01021300  | 1.43390800  |           |             |             |             |
| H          | -0.99796500 | 1.24279300  | 0.23421800  | <b>4d</b> |             |             |             |
| S          | -2.55944100 | -0.27120100 | -0.64214100 | N         | 0.75003300  | 1.05803900  | -0.54260300 |
| C          | -3.97913000 | -0.07028500 | 0.41160800  | H         | 1.56782000  | 0.45782700  | -0.28909500 |
| H          | -3.97778300 | 0.93825800  | 0.82714700  | C         | -0.37749500 | 1.10696400  | 0.26541700  |
|            |             |             |             | C         | -1.29992400 | -0.18182400 | 0.05634100  |
|            |             |             |             | H         | -0.10355000 | 1.03669500  | 1.32183500  |
|            |             |             |             | H         | -1.00758100 | 1.96866500  | 0.06749900  |

|           |             |             |             |           |             |             |             |
|-----------|-------------|-------------|-------------|-----------|-------------|-------------|-------------|
| O         | -2.44122700 | -0.14747900 | 0.34546900  | O         | -3.26090500 | -0.44367400 | -0.24451500 |
| O         | -0.59490100 | -1.19211300 | -0.41829800 | H         | -4.01447800 | 0.09216500  | -0.49523600 |
| H         | -1.16197600 | -1.97233000 | -0.50144100 | H         | -3.57135500 | -1.34933600 | -0.21208600 |
| H         | 0.75476800  | 1.53406900  | -1.43668800 |           |             |             |             |
| O         | 2.80894300  | -0.46682100 | 0.31298900  | <b>5d</b> |             |             |             |
| H         | 2.94738900  | -1.39360100 | 0.11449100  | N         | -0.72935100 | 1.07557500  | -0.68502000 |
| H         | 3.63488500  | -0.13713300 | 0.66979100  | H         | -1.55653700 | 0.49178800  | -0.33966300 |
|           |             |             |             | C         | 0.61921900  | 0.74327700  | -0.42937500 |
| <b>5a</b> |             |             |             | H         | 1.23122700  | 1.00548200  | -1.29654500 |
| N         | 1.84674500  | 1.16091100  | -0.55267400 | C         | 1.12790200  | 1.60962300  | 0.77328800  |
| H         | 1.66708100  | 1.89570700  | 0.11747100  | C         | 0.73451300  | -0.74280300 | -0.09559400 |
| C         | 1.56694400  | -0.14413700 | -0.24463300 | H         | 0.55468500  | 1.38157300  | 1.66882500  |
| H         | 1.93910600  | -0.82243600 | -1.00621000 | H         | 2.17485600  | 1.35491900  | 0.92374600  |
| C         | 1.89234000  | -0.57153700 | 1.18244500  | H         | 1.04726900  | 2.66805000  | 0.53738700  |
| C         | -0.10861700 | -0.33446700 | -0.34138000 | O         | -0.20222700 | -1.42053200 | 0.21125000  |
| H         | 1.46962900  | 0.11808300  | 1.91186300  | O         | 1.99156800  | -1.13141900 | -0.17293900 |
| H         | 1.50643800  | -1.57093800 | 1.36892700  | H         | 2.06336200  | -2.06575800 | 0.06191100  |
| H         | 2.97591600  | -0.58979300 | 1.29318600  | H         | -0.92413500 | 1.95962300  | -1.14510300 |
| O         | -0.49604000 | -1.33041900 | -0.84545500 | H         | -2.79681100 | -0.27146300 | 0.24938200  |
| O         | -0.70937900 | 0.65973800  | 0.20704800  | O         | -2.57268500 | -1.17413700 | 0.48465300  |
| H         | -1.71898400 | 0.51355700  | 0.23335100  | H         | -3.74262200 | -0.22383200 | 0.10847100  |
| H         | 2.05132000  | 1.44479700  | -1.49932200 |           |             |             |             |
| O         | -3.21794500 | 0.25880500  | 0.32324900  | <b>5e</b> |             |             |             |
| H         | -3.66335400 | -0.44182300 | -0.15457600 | N         | -2.11922300 | -1.01536200 | -0.11392900 |
| H         | -3.87145300 | 0.92232400  | 0.54670600  | H         | -1.56807900 | -1.79663900 | 0.27206500  |
|           |             |             |             | C         | -1.38285000 | 0.15260900  | -0.38119900 |
| <b>5b</b> |             |             |             | H         | -1.54258900 | 0.43697000  | -1.43187600 |
| N         | -0.83664400 | -0.69611800 | 0.09949400  | C         | -1.89214100 | 1.34704800  | 0.48117700  |
| H         | -0.43909900 | -1.54787800 | 0.50950100  | C         | 0.08725800  | -0.21076400 | -0.11983100 |
| C         | 0.09815100  | 0.29286200  | -0.27466100 | H         | -1.75883500 | 1.12767900  | 1.53797100  |
| H         | -0.06738800 | 0.54016400  | -1.33254900 | H         | -1.28991900 | 2.20906300  | 0.20476700  |
| C         | -0.13855800 | 1.59987100  | 0.53206400  | H         | -2.93851200 | 1.55639100  | 0.27038800  |
| C         | 1.49122100  | -0.30361000 | -0.07295100 | O         | 0.35560300  | -1.30058600 | 0.32341300  |
| H         | 0.02628900  | 1.42343000  | 1.59270900  | O         | 0.89170100  | 0.75504600  | -0.41929500 |
| H         | 0.57061700  | 2.34030900  | 0.17038800  | H         | 1.84919100  | 0.50911500  | -0.22769800 |
| H         | -1.15085400 | 1.96227700  | 0.36870500  | H         | -3.12038400 | -1.08564000 | -0.26408200 |
| O         | 1.64049300  | -1.38201900 | 0.42707600  | O         | 3.33414700  | 0.12786200  | 0.14390700  |
| O         | 2.43389500  | 0.50636900  | -0.50246100 | H         | 3.55430500  | -0.77150800 | 0.38807400  |
| H         | 3.30263700  | 0.10771600  | -0.36080200 | H         | 4.12418200  | 0.53016500  | -0.21718000 |
| H         | -1.87120000 | -0.55369800 | -0.00700000 |           |             |             |             |
| O         | -3.46713600 | -0.18554000 | -0.20693900 | <b>5f</b> |             |             |             |
| H         | -4.09534000 | -0.07367200 | 0.50829300  | N         | 0.18747100  | 1.27065000  | -1.19006700 |
| H         | -3.98205000 | -0.37103900 | -0.99382300 | H         | -0.39341500 | 0.94137900  | -1.96164600 |
|           |             |             |             | C         | 0.14302000  | 0.56522800  | 0.00052200  |
| <b>5c</b> |             |             |             | H         | 1.02894200  | -0.18174000 | -0.06809400 |
| N         | -0.87563500 | 0.50875500  | 0.64215100  | C         | 0.40051800  | 1.38391200  | 1.26039900  |
| H         | -0.66754400 | 0.67837000  | 1.61962800  | C         | -1.07215200 | -0.37097200 | -0.05656900 |
| C         | 0.13692100  | 0.63123700  | -0.30341800 | H         | -0.42676700 | 2.06960800  | 1.43916500  |
| H         | -0.27902600 | 0.55242200  | -1.30434800 | H         | 0.49193200  | 0.71501800  | 2.11096100  |
| C         | 1.01763900  | 1.87823900  | -0.12335600 | H         | 1.32434800  | 1.95364700  | 1.16708600  |
| C         | 1.12474500  | -0.61791700 | -0.15704600 | O         | -1.63996900 | -0.58472300 | -1.08709600 |
| H         | 1.44627200  | 1.92040200  | 0.87744100  | O         | -1.33732900 | -0.89615300 | 1.12043500  |
| H         | 1.82175000  | 1.85073000  | -0.85545200 | H         | -2.09254600 | -1.49463400 | 1.04759000  |
| H         | 0.41304900  | 2.76606500  | -0.29503800 | H         | 0.80749900  | 2.05953700  | -1.32243700 |
| O         | 1.66270100  | -1.07175300 | -1.10370700 | O         | 2.43762200  | -1.16039700 | -0.18169100 |
| O         | 1.25025100  | -0.96990200 | 1.11040300  | H         | 2.99544100  | -1.32957400 | 0.57981600  |
| H         | 1.90353400  | -1.67864700 | 1.19318000  | H         | 2.44136000  | -1.96662200 | -0.70126900 |
| H         | -1.81496700 | 0.13982900  | 0.38232700  |           |             |             |             |

|           |             |             |             |           |             |             |             |
|-----------|-------------|-------------|-------------|-----------|-------------|-------------|-------------|
| <b>6a</b> |             |             |             | O         | -1.18788200 | 1.37036000  | 0.00158200  |
| N         | -0.27623300 | 0.92701900  | 0.19540300  | O         | -1.58289400 | -0.83219400 | -0.25047400 |
| C         | -1.53531700 | 1.45141000  | -0.23212100 | H         | -2.54064600 | -0.61356300 | -0.04217600 |
| C         | -0.31734700 | -0.48121700 | 0.46123600  | H         | 0.99759100  | 1.96630500  | -0.15356400 |
| H         | -1.41698400 | 1.71974300  | -1.29410700 | O         | -4.03014600 | -0.21635000 | 0.36122500  |
| H         | -1.74928400 | 2.38756600  | 0.28976000  | H         | -4.25088700 | 0.71488100  | 0.39860300  |
| C         | -2.52481200 | 0.30657300  | -0.02193300 | H         | -4.82260500 | -0.68819100 | 0.10488500  |
| C         | -1.64723700 | -0.94111100 | -0.15685000 |           |             |             |             |
| H         | -0.35396800 | -0.59908400 | 1.55682500  | <b>6d</b> |             |             |             |
| C         | 0.96327800  | -1.16636200 | -0.00899500 | N         | -0.38848600 | -0.83544600 | -0.95057200 |
| H         | -3.33624100 | 0.33206900  | -0.74301700 | C         | -1.61457300 | -1.45211900 | -0.53912900 |
| H         | -2.95791700 | 0.36899100  | 0.97627200  | C         | 0.18360900  | 0.02084500  | 0.02704100  |
| H         | -1.49328900 | -1.20216600 | -1.20439000 | H         | -1.41268100 | -2.52930300 | -0.44155600 |
| H         | -2.04681900 | -1.81090500 | 0.35424100  | H         | -2.37027800 | -1.35051800 | -1.32235900 |
| O         | 1.92027900  | -0.57868200 | -0.42175100 | C         | -1.92681900 | -0.78043000 | 0.79912800  |
| O         | 0.84785500  | -2.47508900 | 0.12013400  | C         | -0.54548400 | -0.36699600 | 1.32186600  |
| H         | 1.66288400  | -2.90367400 | -0.17152300 | H         | -0.13118700 | 1.05743200  | -0.24267900 |
| O         | 0.61314100  | 1.49228700  | 0.22100700  | C         | 1.70177200  | -0.03225900 | -0.07450600 |
| O         | 2.01321500  | 2.29351600  | 0.07391400  | H         | -2.45248400 | -1.44981700 | 1.47331000  |
| H         | 2.71671600  | 1.70404300  | -0.20511100 | H         | -2.54635600 | 0.09922300  | 0.62990500  |
| H         | 2.41321600  | 3.08828600  | 0.42583500  | H         | -0.03186000 | -1.19985700 | 1.80333600  |
|           |             |             |             | H         | -0.58210600 | 0.46285300  | 2.01985000  |
| <b>6b</b> |             |             |             | O         | 2.25945500  | -0.52781400 | -1.00993700 |
| N         | 1.19190900  | -1.13777200 | -0.41334700 | O         | 2.26639500  | 0.54982100  | 0.96588400  |
| C         | 2.24056800  | -1.05898500 | 0.57156800  | H         | 3.22734600  | 0.52158200  | 0.87010000  |
| C         | 0.73503700  | 0.11379200  | -0.87226000 | H         | 0.13512400  | -1.07277000 | -1.79166800 |
| H         | 3.16538000  | -1.41380900 | 0.09576000  | O         | -1.38859300 | 2.56663700  | -0.50502400 |
| H         | 2.02892400  | -1.73375600 | 1.40242900  | H         | -1.51911600 | 3.22819200  | 0.17557400  |
| C         | 2.29830500  | 0.43264400  | 0.90927400  | H         | -1.48607900 | 3.03770700  | -1.33359800 |
| C         | 1.76811600  | 1.10809800  | -0.36077200 |           |             |             |             |
| H         | 0.56661400  | 0.09676400  | -1.95423300 | <b>7a</b> |             |             |             |
| C         | -0.73162700 | 0.35474800  | -0.29558500 | N         | -0.76348000 | 1.62488300  | 0.21365100  |
| H         | 3.30369500  | 0.74954600  | 1.16844900  | H         | -0.46072000 | 2.01763000  | -0.67190800 |
| H         | 1.64711900  | 0.64388900  | 1.75713400  | C         | -0.20326500 | 0.35992200  | 0.58751500  |
| H         | 2.55576600  | 1.22504900  | -1.10426300 | H         | -0.26959400 | 0.23866000  | 1.66602000  |
| H         | 1.31834500  | 2.07853500  | -0.17361600 | C         | -0.98146400 | -0.75981300 | -0.12540200 |
| O         | -1.05197900 | 1.42569800  | 0.10540700  | C         | 1.26504100  | 0.30728800  | 0.12219600  |
| O         | -1.43720400 | -0.73810700 | -0.38368900 | H         | -0.67433500 | -0.82549900 | -1.17333200 |
| H         | -2.38046600 | -0.57685800 | -0.06775000 | H         | -0.78957100 | -1.72510600 | 0.33835900  |
| H         | 0.74494700  | -2.00598700 | -0.68424100 | C         | -2.44656300 | -0.38621900 | -0.12807600 |
| O         | -3.82129000 | -0.27760500 | 0.50247900  | O         | 1.65810900  | 1.02533900  | -0.75771600 |
| H         | -4.62859300 | -0.70731200 | 0.21887300  | O         | -2.76643400 | 0.80844100  | -0.08430400 |
| H         | -4.04370300 | 0.62666800  | 0.72797300  | N         | -3.35049400 | -1.34861000 | -0.21846000 |
|           |             |             |             | H         | -4.32740700 | -1.11140000 | -0.27880600 |
| <b>6c</b> |             |             |             | H         | -3.08848000 | -2.31712700 | -0.25874800 |
| N         | 1.42183200  | 1.03861800  | -0.17620300 | O         | 1.93005500  | -0.61445400 | 0.75798100  |
| C         | 2.69507900  | 0.69398200  | 0.37812100  | H         | 2.86684700  | -0.66903100 | 0.40817400  |
| C         | 0.62013600  | -0.08315600 | -0.54095300 | H         | -1.05905600 | 2.28259800  | 0.91836400  |
| H         | 2.66411500  | 0.96939900  | 1.44370700  | O         | 4.32127200  | -0.71943200 | -0.28075000 |
| H         | 3.48094800  | 1.30830100  | -0.07032500 | H         | 5.14296100  | -0.94874500 | 0.15345800  |
| C         | 2.79229400  | -0.81596300 | 0.15581600  | H         | 4.51066500  | -0.00210800 | -0.88700900 |
| C         | 1.32628000  | -1.26736000 | 0.13156700  |           |             |             |             |
| H         | 0.67295800  | -0.18086200 | -1.63941700 | <b>7b</b> |             |             |             |
| C         | -0.84990900 | 0.23722900  | -0.21921300 | N         | 0.12507300  | 0.71287700  | 1.19953600  |
| H         | 3.37137500  | -1.30171300 | 0.93543600  | H         | 0.28866100  | 1.56595100  | 0.63536500  |
| H         | 3.27607200  | -1.01837900 | -0.79951800 | C         | 0.35528200  | -0.55997000 | 0.58796300  |
| H         | 0.93408100  | -1.39847200 | 1.14035900  | H         | 0.20226700  | -1.34838900 | 1.32178300  |
| H         | 1.16826500  | -2.19095500 | -0.41526600 | C         | -0.63373500 | -0.71664200 | -0.57676500 |

|           |             |             |             |           |             |             |             |
|-----------|-------------|-------------|-------------|-----------|-------------|-------------|-------------|
| C         | 1.79020100  | -0.64576100 | 0.04084900  | H         | 5.40750200  | 0.07643600  | -0.74676000 |
| H         | -0.36371300 | -0.03786900 | -1.39076600 |           |             |             |             |
| H         | -0.63181300 | -1.73432900 | -0.96209400 | <b>8a</b> |             |             |             |
| C         | -1.99130700 | -0.27906800 | -0.06927600 | N         | 0.60596600  | 1.79574500  | -0.59689500 |
| O         | 2.44528600  | 0.30566200  | -0.26629200 | H         | 0.26948300  | 1.55741100  | -1.52572700 |
| O         | -2.05200000 | 0.51701900  | 0.87206000  | C         | -0.16304000 | 1.32026100  | 0.50876400  |
| N         | -3.07544200 | -0.74352900 | -0.67402400 | H         | -0.57257700 | 2.17812700  | 1.05199000  |
| H         | -3.98373600 | -0.42500700 | -0.37865400 | C         | 0.68868000  | 0.50471900  | 1.50078800  |
| H         | -3.01939900 | -1.39466500 | -1.43597900 | C         | -1.32601000 | 0.51418500  | -0.07375200 |
| O         | 2.15827700  | -1.91150600 | -0.07390000 | H         | 1.49726400  | 1.13577000  | 1.87121600  |
| H         | 3.04805000  | -1.95537700 | -0.44750700 | H         | 0.04541000  | 0.27416900  | 2.34753500  |
| H         | 0.06880100  | 0.79081000  | 2.20324000  | C         | 1.24317100  | -0.79692800 | 0.94019200  |
| O         | 0.67629800  | 2.58897200  | -0.70243200 | O         | -1.43897800 | 0.35111300  | -1.26300000 |
| H         | 1.60425200  | 2.44451100  | -0.90179200 | H         | 1.71238000  | -1.35610200 | 1.74991100  |
| H         | 0.49367200  | 3.51639400  | -0.85429000 | H         | 0.43806500  | -1.43063500 | 0.55711500  |
|           |             |             |             | C         | 2.25135000  | -0.62924200 | -0.17432500 |
| <b>7c</b> |             |             |             | O         | 2.28684300  | 0.37827000  | -0.89274900 |
| N         | 1.27711700  | -1.60467800 | -0.17292600 | N         | 3.10865800  | -1.62378700 | -0.37398800 |
| H         | 1.68363800  | -1.78776700 | 0.73724500  | H         | 3.76841900  | -1.56673500 | -1.13192500 |
| C         | 0.99926400  | -0.23588500 | -0.50465100 | H         | 3.11443500  | -2.44116000 | 0.20881100  |
| H         | 0.92309400  | -0.13666800 | -1.58515800 | O         | -2.11441500 | 0.05105200  | 0.85573600  |
| C         | -0.32556200 | 0.16863000  | 0.16194500  | H         | -2.86428900 | -0.46497900 | 0.44375700  |
| C         | 2.12462300  | 0.65517700  | 0.03471300  | H         | 1.29909800  | 2.51928200  | -0.49063300 |
| H         | -0.17433500 | 0.32778800  | 1.23357200  | O         | -3.98325000 | -1.33606900 | -0.34140100 |
| H         | -0.73203900 | 1.08776800  | -0.25406300 | H         | -3.97988400 | -1.20163500 | -1.29019900 |
| C         | -1.27910000 | -0.99712700 | 0.03119900  | H         | -4.89667600 | -1.44011200 | -0.07435500 |
| O         | 2.84314000  | 0.31449800  | 0.92594400  |           |             |             |             |
| O         | -0.81069500 | -2.14886000 | -0.04341800 | <b>8b</b> |             |             |             |
| N         | -2.57264500 | -0.76135500 | 0.03898600  | N         | -0.52671600 | 0.74617900  | 1.21949700  |
| H         | -3.21227900 | -1.53848600 | 0.00492300  | H         | -0.84647800 | 1.53699500  | 0.61963100  |
| H         | -2.93298400 | 0.19245200  | 0.08547400  | C         | -0.84519500 | -0.61958400 | 0.95516300  |
| O         | 2.13784600  | 1.82565900  | -0.58274600 | H         | -1.48687400 | -0.98692000 | 1.76404900  |
| H         | 2.83447900  | 2.37853700  | -0.20571000 | C         | 0.41469700  | -1.51423000 | 0.93978200  |
| H         | 1.51886000  | -2.25966300 | -0.89996200 | C         | -1.62996600 | -0.71615200 | -0.34684100 |
| O         | -3.25841900 | 1.99296700  | 0.10297500  | H         | 0.92583700  | -1.40222000 | 1.89656500  |
| H         | -3.69444300 | 2.42872900  | -0.63035000 | H         | 0.06915400  | -2.54438900 | 0.88061100  |
| H         | -3.55561700 | 2.45066100  | 0.89033400  | C         | 1.37716500  | -1.25079900 | -0.20967000 |
|           |             |             |             | O         | -1.80135100 | 0.19864800  | -1.09973100 |
| <b>7d</b> |             |             |             | H         | 2.14865300  | -2.02124000 | -0.20033200 |
| N         | -0.83181000 | 1.50742800  | -0.28738000 | H         | 0.87050900  | -1.33951100 | -1.17492700 |
| H         | -1.11966800 | 1.92821300  | 0.58855200  | C         | 2.04656800  | 0.10655900  | -0.17310100 |
| C         | -1.20706200 | 0.14007200  | -0.51041200 | O         | 1.56451800  | 1.06365700  | 0.43769800  |
| H         | -1.18480100 | -0.06911100 | -1.57768800 | N         | 3.18732600  | 0.23330400  | -0.84772300 |
| C         | -0.20911900 | -0.76680200 | 0.22818800  | H         | 3.64904000  | 1.12676900  | -0.87489300 |
| C         | -2.61455100 | -0.10024800 | 0.04891500  | H         | 3.60969400  | -0.54107400 | -1.32645400 |
| H         | -0.42176700 | -0.76812500 | 1.30117900  | O         | -2.07407400 | -1.95134100 | -0.53192600 |
| H         | -0.26931000 | -1.79399900 | -0.12515200 | H         | -2.57814600 | -1.98921500 | -1.35413700 |
| C         | 1.17188500  | -0.17140500 | 0.06002200  | H         | -0.11537900 | 0.97929100  | 2.11088900  |
| O         | -3.11025300 | 0.61087200  | 0.87047800  | O         | -1.45681400 | 2.91698300  | -0.14409300 |
| O         | 1.27077200  | 1.05826900  | -0.11927400 | H         | -1.09151100 | 3.79665300  | -0.23377400 |
| N         | 2.22640300  | -0.95008400 | 0.14537200  | H         | -1.81661100 | 2.67013200  | -0.99723300 |
| H         | 3.17757400  | -0.56527000 | 0.09309900  |           |             |             |             |
| H         | 2.11626400  | -1.93725000 | 0.29550200  | <b>8c</b> |             |             |             |
| O         | -3.14397200 | -1.19918100 | -0.46424600 | N         | 0.85443300  | -1.25051300 | 1.11156100  |
| H         | -4.01594100 | -1.34763100 | -0.07585800 | H         | 0.81445800  | -1.98739100 | 0.41668000  |
| H         | -0.75558800 | 2.13905900  | -1.06911000 | C         | 1.74513600  | -0.15831500 | 0.86401300  |
| O         | 4.87123300  | -0.03812000 | 0.03747100  | H         | 2.53643900  | -0.15514100 | 1.61987400  |
| H         | 5.35441700  | 0.37185000  | 0.75458800  | C         | 1.01822900  | 1.19803600  | 0.93751000  |



|   |             |             |             |
|---|-------------|-------------|-------------|
| C | 2.38759300  | -0.40431400 | -0.49718400 |
| H | 0.61152800  | 1.31869100  | 1.94207900  |
| H | 1.77028600  | 1.97283000  | 0.80131000  |
| C | -0.07647600 | 1.38288100  | -0.10369000 |
| O | 2.09183900  | -1.32961500 | -1.19780900 |
| H | -0.42287300 | 2.41552600  | -0.06881600 |
| H | 0.31282600  | 1.22414300  | -1.11361300 |
| C | -1.27475800 | 0.47249400  | 0.05790300  |
| O | -1.18307800 | -0.64536700 | 0.60240900  |
| N | -2.43308800 | 0.88994500  | -0.41279500 |
| H | -3.26790500 | 0.29797900  | -0.37498800 |
| H | -2.51143700 | 1.79900100  | -0.83254900 |
| O | 3.28183900  | 0.52762100  | -0.78626900 |
| H | 3.68360500  | 0.33013200  | -1.64154900 |
| H | 0.53611900  | -1.45470100 | 2.04467700  |
| O | -4.84221900 | -0.59068500 | -0.42259500 |
| H | -5.10308100 | -1.23804700 | -1.07703300 |
| H | -5.49477100 | -0.63938400 | 0.27536200  |

**8d**

|   |             |             |             |
|---|-------------|-------------|-------------|
| N | -1.28240800 | 1.61040300  | 0.01659300  |
| H | -2.27975500 | 1.83315800  | 0.03978300  |
| C | -0.93402500 | 0.24915100  | -0.07386100 |
| H | -0.28640200 | 0.15005000  | -0.95806700 |
| C | -0.04982300 | -0.17436500 | 1.15369300  |
| C | -2.21148600 | -0.56237900 | -0.23780900 |
| H | 0.42668200  | 0.72037800  | 1.55086000  |
| H | -0.71418300 | -0.55980400 | 1.92589600  |
| C | 1.01072800  | -1.20339900 | 0.80044200  |
| O | -3.29459500 | -0.05457800 | -0.20421100 |
| H | 1.47387500  | -1.55223800 | 1.72522000  |
| H | 0.56726300  | -2.08085800 | 0.32634600  |
| C | 2.09612500  | -0.64191000 | -0.10582900 |
| O | 2.03237100  | 0.49344300  | -0.56542600 |
| N | 3.11055800  | -1.46453800 | -0.38510400 |
| H | 3.85215200  | -1.14127000 | -0.98262200 |
| H | 3.16882800  | -2.39115600 | -0.00471200 |
| O | -1.95752700 | -1.84850900 | -0.40750300 |
| H | -2.78902200 | -2.33019000 | -0.50665800 |
| H | -0.49502700 | 2.32713200  | 0.01807300  |
| O | 0.96010500  | 2.91611500  | 0.01929100  |
| H | 1.32312900  | 3.75123200  | -0.27276900 |
| H | 1.56347700  | 2.19814800  | -0.23878800 |

**9a**

|   |             |             |             |
|---|-------------|-------------|-------------|
| N | -0.02690900 | 1.84776000  | 0.08318500  |
| H | 0.43466900  | 2.13909800  | -0.77394300 |
| C | 0.44019300  | 0.51310300  | 0.43781400  |
| H | 0.29023000  | 0.35573900  | 1.50668900  |
| C | -0.35072200 | -0.57581200 | -0.32327300 |
| C | 1.92949400  | 0.31161500  | 0.13272200  |
| H | -0.13872700 | -0.48782900 | -1.39835300 |
| H | -0.01795200 | -1.56978000 | -0.02727000 |
| C | -1.81036900 | -0.46702700 | -0.16185900 |
| O | 2.54649500  | 1.08808600  | -0.54772200 |
| N | -2.44924800 | 0.69528900  | -0.01841400 |
| C | -2.87025400 | -1.46394800 | -0.14843300 |
| H | -1.88051800 | 1.56317200  | 0.02186000  |

|   |             |             |             |
|---|-------------|-------------|-------------|
| C | -3.78276700 | 0.42996400  | 0.07768300  |
| N | -4.04090200 | -0.88018500 | -0.00235400 |
| H | -2.74851800 | -2.53301200 | -0.24108900 |
| H | -4.52711000 | 1.20139500  | 0.20338100  |
| O | 2.39354600  | -0.79383800 | 0.66630900  |
| H | 3.35019200  | -0.90843200 | 0.41456700  |
| H | 0.27349000  | 2.51198200  | 0.78533600  |
| O | 4.87454600  | -0.93230000 | -0.19768900 |
| H | 5.05569000  | -0.09723700 | -0.63267800 |
| H | 5.67782200  | -1.19809600 | 0.24946600  |

**9b**

|   |             |             |             |
|---|-------------|-------------|-------------|
| N | -0.14533800 | 1.63006400  | 0.34347300  |
| H | -0.44250400 | 1.65645200  | 1.31243700  |
| C | -0.45092500 | 0.32830600  | -0.25337700 |
| H | -0.30329500 | 0.42940500  | -1.33226100 |
| C | 0.49735800  | -0.76107700 | 0.26369900  |
| C | -1.90180100 | -0.13635800 | -0.07162700 |
| H | 0.32665300  | -0.92327900 | 1.33726600  |
| H | 0.26911200  | -1.71947600 | -0.20056400 |
| C | 1.92195800  | -0.44056100 | 0.08246600  |
| O | -2.18942600 | -1.27316700 | 0.19863100  |
| N | 2.40829200  | 0.80190600  | 0.05365500  |
| C | 3.09484700  | -1.28694500 | -0.07587600 |
| H | 1.75194200  | 1.59574900  | 0.15663700  |
| C | 3.76001200  | 0.71930600  | -0.10918500 |
| N | 4.17869300  | -0.54757300 | -0.18860300 |
| H | 3.10796900  | -2.36643300 | -0.10529500 |
| H | 4.39812000  | 1.58805600  | -0.16462100 |
| O | -2.74706500 | 0.84913000  | -0.26659600 |
| H | -3.67858300 | 0.50781900  | -0.19096500 |
| H | -0.67330700 | 2.35292100  | -0.12905700 |
| O | -5.11591500 | -0.28413800 | -0.12333300 |
| H | -5.96397400 | 0.00827600  | 0.20897400  |
| H | -4.99311100 | -1.19089200 | 0.16155500  |

**9c**

|   |             |             |             |
|---|-------------|-------------|-------------|
| N | 1.00700500  | 1.17008900  | 1.01724600  |
| H | 1.91484000  | 1.62707200  | 0.97501600  |
| C | 1.16238600  | -0.17513200 | 0.49387800  |
| H | 0.96434600  | -0.92917000 | 1.25894100  |
| C | 0.22087000  | -0.45315800 | -0.72317200 |
| C | 2.61094900  | -0.38975700 | 0.04362400  |
| H | 0.35239600  | 0.34970500  | -1.44903700 |
| H | 0.50911900  | -1.40076300 | -1.17620700 |
| C | -1.19031000 | -0.53788900 | -0.31821200 |
| O | 3.44698200  | 0.46078000  | 0.11734600  |
| N | -2.03569400 | 0.49056500  | -0.22461100 |
| C | -1.98175200 | -1.69174600 | 0.08484700  |
| H | -1.75968700 | 1.48387600  | -0.41227400 |
| C | -3.23410200 | 0.00015100  | 0.19952600  |
| N | -3.20758200 | -1.32496500 | 0.38720600  |
| H | -1.64214500 | -2.71631800 | 0.12940200  |
| H | -4.09729900 | 0.62874300  | 0.35765200  |
| O | 2.80743000  | -1.61946500 | -0.42035200 |
| H | 3.73243800  | -1.71434900 | -0.67860100 |
| H | 0.72463100  | 1.15909500  | 1.98662200  |
| O | -0.72946800 | 2.72313900  | -0.60529700 |

|           |             |             |             |
|-----------|-------------|-------------|-------------|
| H         | -0.01635100 | 2.45534200  | 0.00477100  |
| H         | -0.75619400 | 3.67649700  | -0.67169400 |
| <b>9d</b> |             |             |             |
| N         | -2.74065300 | 0.70237500  | 1.00253100  |
| H         | -3.11434300 | -0.01438200 | 1.60415600  |
| C         | -1.49577900 | 0.39672200  | 0.39279500  |
| H         | -1.18639700 | 1.27101700  | -0.18935500 |
| C         | -0.32963300 | 0.05061800  | 1.37803900  |
| C         | -1.58891600 | -0.73590500 | -0.63247600 |
| H         | -0.17220000 | 0.92739000  | 2.00869100  |
| H         | -0.63271000 | -0.77537700 | 2.01997900  |
| C         | 0.92623900  | -0.30076000 | 0.69820800  |
| O         | -0.62512200 | -1.39826700 | -0.93913800 |
| N         | 1.65955100  | 0.53698000  | -0.05515400 |
| C         | 1.68715100  | -1.52851300 | 0.70062600  |
| H         | 1.41703400  | 1.50783300  | -0.29187800 |
| C         | 2.75711400  | -0.14890600 | -0.47745800 |
| N         | 2.78582100  | -1.39765300 | -0.01891000 |
| H         | 1.41085900  | -2.44470300 | 1.19927500  |
| H         | 3.51156500  | 0.29633300  | -1.10751100 |
| O         | -2.78146100 | -0.88740600 | -1.16268200 |
| H         | -2.74447900 | -1.59534400 | -1.81851400 |
| H         | -2.78130800 | 1.60480600  | 1.44493700  |
| O         | 0.78325000  | 3.11322100  | -0.65168400 |
| H         | 0.58321700  | 3.41170000  | -1.54015000 |
| H         | 1.02532700  | 3.89889300  | -0.15927100 |

|           |             |             |             |
|-----------|-------------|-------------|-------------|
| <b>9e</b> |             |             |             |
| N         | 0.46222000  | -0.53981000 | 1.42501400  |
| H         | 0.53785500  | 0.45802700  | 1.58315100  |
| C         | 1.06996300  | -0.94282100 | 0.16560000  |
| H         | 1.23178900  | -2.01688100 | 0.20025600  |
| C         | 0.11889000  | -0.60991400 | -1.02245000 |
| C         | 2.40753800  | -0.23887300 | -0.05453900 |
| H         | 0.43213200  | 0.31051300  | -1.51412000 |
| H         | 0.14465500  | -1.41140300 | -1.75894300 |
| C         | -1.25999800 | -0.42560700 | -0.52471800 |
| O         | 2.50021500  | 0.95854900  | -0.18749100 |
| N         | -1.76784700 | 0.76192600  | -0.18725300 |
| C         | -2.33655000 | -1.36492700 | -0.26593800 |
| H         | -1.19646700 | 1.62708700  | -0.16592100 |
| C         | -3.03611000 | 0.55450100  | 0.26041800  |
| N         | -3.39089400 | -0.73386600 | 0.20441300  |
| H         | -2.30896300 | -2.43222700 | -0.42697700 |
| H         | -3.66913400 | 1.35415100  | 0.61340600  |
| O         | 3.43791000  | -1.06023600 | -0.04100800 |
| H         | 4.25571500  | -0.55632600 | -0.14658800 |
| H         | 0.88303200  | -1.01450700 | 2.21098300  |
| O         | 0.22864000  | 2.56894700  | -0.01126900 |
| H         | 1.11048700  | 2.17230000  | -0.10962800 |
| H         | 0.33802900  | 3.51929100  | -0.01293300 |

|            |             |            |             |
|------------|-------------|------------|-------------|
| <b>10a</b> |             |            |             |
| N          | -3.81238000 | 0.93635000 | 0.69072100  |
| H          | -4.30111100 | 0.23180400 | 1.22570000  |
| C          | -2.55706200 | 0.45404400 | 0.17179000  |
| H          | -2.15947600 | 1.22463200 | -0.49603400 |

|   |             |             |             |
|---|-------------|-------------|-------------|
| C | -1.56235000 | 0.25401400  | 1.33483900  |
| C | -2.63843600 | -0.81528200 | -0.68113900 |
| H | -1.59340900 | 1.17187500  | 1.92197600  |
| H | -1.91430500 | -0.56006700 | 1.96926000  |
| C | -0.17542400 | -0.00719600 | 0.88881000  |
| O | -1.86851100 | -1.73993200 | -0.61634200 |
| C | 0.48081800  | -1.27746700 | 0.87189300  |
| C | 0.75644600  | 0.90932700  | 0.35239400  |
| H | 0.08395800  | -2.22639200 | 1.19264500  |
| N | 1.69115200  | -1.15663800 | 0.37565300  |
| C | 1.92185900  | 0.18440500  | 0.02846700  |
| C | 0.71696600  | 2.28992500  | 0.11657900  |
| H | 2.36635000  | -1.92122700 | 0.24930800  |
| C | 3.03217200  | 0.76666600  | -0.51879000 |
| C | 1.83249600  | 2.89316100  | -0.43751600 |
| H | -0.16040100 | 2.87131300  | 0.36692000  |
| H | 3.91867100  | 0.19849900  | -0.76277400 |
| C | 2.96653600  | 2.14666200  | -0.75000500 |
| H | 1.82910100  | 3.95647400  | -0.62915700 |
| H | 3.82397500  | 2.64452300  | -1.18143600 |
| O | -3.65872300 | -0.77555600 | -1.53096900 |
| H | -3.65803300 | -1.58522400 | -2.05466400 |
| H | -4.42731400 | 1.25326300  | -0.04395800 |
| O | 3.59639300  | -3.14418300 | -0.02152600 |
| H | 3.61952100  | -3.75572600 | -0.75775600 |
| H | 4.22367300  | -3.47390900 | 0.62212100  |

|            |             |             |             |
|------------|-------------|-------------|-------------|
| <b>10b</b> |             |             |             |
| N          | -2.74612400 | -1.91869700 | -1.13590900 |
| H          | -3.50657400 | -1.28616700 | -1.34451400 |
| C          | -1.68582300 | -1.27545200 | -0.38948200 |
| H          | -0.95731900 | -2.04229000 | -0.12104500 |
| C          | -1.01879000 | -0.21687800 | -1.28390500 |
| C          | -2.20085100 | -0.66689700 | 0.91255200  |
| H          | -0.72235100 | -0.73484400 | -2.19733700 |
| H          | -1.74925000 | 0.54758400  | -1.54950200 |
| C          | 0.16683500  | 0.42219400  | -0.66690800 |
| O          | -2.42464500 | 0.50460100  | 1.10013500  |
| C          | 0.22995500  | 1.77550500  | -0.20930400 |
| C          | 1.43192400  | -0.14054600 | -0.39257600 |
| H          | -0.56280400 | 2.51482600  | -0.25989900 |
| N          | 1.42243500  | 2.01205100  | 0.30175100  |
| C          | 2.22019900  | 0.85749800  | 0.21936400  |
| C          | 1.98735500  | -1.40839600 | -0.62106400 |
| H          | 1.71599600  | 2.89474800  | 0.68767200  |
| C          | 3.51077500  | 0.64884400  | 0.61591800  |
| C          | 3.29329000  | -1.63652600 | -0.22434300 |
| H          | 1.41160800  | -2.18619300 | -1.10439300 |
| H          | 4.10778600  | 1.41931100  | 1.08346600  |
| C          | 4.03899300  | -0.62985900 | 0.38315500  |
| H          | 3.74472400  | -2.60399200 | -0.38982400 |
| H          | 5.05793600  | -0.83366400 | 0.68221400  |
| O          | -2.43177100 | -1.60088300 | 1.82710500  |
| H          | -2.82642400 | -1.18941100 | 2.60534800  |
| H          | -3.11543000 | -2.72661800 | -0.65650600 |
| O          | -2.53510700 | 2.79554300  | -0.56675400 |
| H          | -2.81786000 | 2.14805300  | 0.08784800  |
| H          | -3.22519800 | 3.45416200  | -0.62875200 |

**10c**

|   |             |             |             |
|---|-------------|-------------|-------------|
| N | -2.31233800 | 2.61701100  | 0.28591000  |
| H | -3.25208600 | 2.48958500  | -0.06333900 |
| C | -1.51203000 | 1.45340200  | 0.03816100  |
| H | -0.86359300 | 1.54755600  | -0.84434400 |
| C | -0.58778500 | 1.19089400  | 1.27046300  |
| C | -2.42083700 | 0.26714800  | -0.26674900 |
| H | -0.12743400 | 2.15200400  | 1.50294800  |
| H | -1.21188500 | 0.91812700  | 2.12026000  |
| C | 0.47222300  | 0.19102800  | 1.03693200  |
| O | -3.57932400 | 0.39376000  | -0.56224000 |
| C | 0.49151200  | -1.14158200 | 1.54231300  |
| C | 1.63756000  | 0.31579800  | 0.24667100  |
| H | -0.23605000 | -1.61768800 | 2.17950500  |
| N | 1.56450400  | -1.77365600 | 1.10545800  |
| C | 2.31950200  | -0.91690900 | 0.28654100  |
| C | 2.17541100  | 1.37238400  | -0.49975400 |
| H | 1.80346400  | -2.72695600 | 1.32468700  |
| C | 3.49291100  | -1.14307300 | -0.37777200 |
| C | 3.36181200  | 1.16045500  | -1.18078700 |
| H | 1.67943200  | 2.33275000  | -0.53798300 |
| H | 4.00917200  | -2.09213500 | -0.34113800 |
| C | 4.00670000  | -0.07183200 | -1.12145900 |
| H | 3.79754000  | 1.95888900  | -1.76374200 |
| H | 4.93326900  | -0.21048400 | -1.66123600 |
| O | -1.79771900 | -0.90381100 | -0.20476200 |
| H | -2.43895400 | -1.60883800 | -0.48214600 |
| H | -1.91821300 | 3.45985000  | -0.09921800 |
| O | -3.74334800 | -2.44192200 | -1.10080800 |
| H | -4.21469100 | -3.23070500 | -0.83567000 |
| H | -4.38387900 | -1.72592700 | -1.14303500 |

**10d**

|   |             |             |             |
|---|-------------|-------------|-------------|
| N | -2.59073200 | 1.07543300  | 1.36428200  |
| H | -3.26305000 | 0.53040300  | 1.88754600  |
| C | -1.74160200 | 0.24315000  | 0.56565100  |
| H | -1.20432200 | 0.88928700  | -0.13301500 |
| C | -0.69495300 | -0.47782200 | 1.47101900  |
| C | -2.48486700 | -0.76536600 | -0.31065200 |
| H | -0.49763700 | 0.22036800  | 2.28433700  |
| H | -1.12564700 | -1.38018300 | 1.90538700  |
| C | 0.57343300  | -0.77917900 | 0.77754000  |
| O | -3.67313600 | -0.84626700 | -0.41284300 |
| C | 1.01805900  | -2.05478000 | 0.32404300  |
| C | 1.57985000  | 0.13479100  | 0.39440800  |
| H | 0.51867800  | -3.00503300 | 0.42310700  |
| N | 2.18722100  | -1.93509700 | -0.27829900 |
| C | 2.59073700  | -0.58862700 | -0.26909100 |
| C | 1.71656200  | 1.52004800  | 0.55817400  |
| H | 2.70988400  | -2.69544100 | -0.68198600 |
| C | 3.71751400  | -0.00228800 | -0.77262000 |
| C | 2.85194700  | 2.13073300  | 0.05151900  |
| H | 0.95406800  | 2.09428500  | 1.06788700  |
| H | 4.49013300  | -0.56289300 | -1.27993900 |
| C | 3.83060300  | 1.38608800  | -0.59909500 |
| H | 2.98365400  | 3.19719700  | 0.16291800  |
| H | 4.70829900  | 1.88710500  | -0.98359300 |

|   |             |             |             |
|---|-------------|-------------|-------------|
| O | -1.64308700 | -1.57185100 | -0.98922900 |
| H | -2.18097400 | -2.14045000 | -1.55288800 |
| H | -3.10736600 | 1.70504700  | 0.76127000  |
| O | -3.63298300 | 2.01258300  | -1.29082400 |
| H | -4.27007100 | 1.29619200  | -1.31503300 |
| H | -4.04111900 | 2.74556300  | -1.75007700 |

**11a**

|   |             |             |             |
|---|-------------|-------------|-------------|
| N | 0.47669800  | 1.78586000  | 0.91675700  |
| N | 1.09349400  | 2.47805300  | 0.50775900  |
| C | 0.74796500  | 0.47268100  | 0.67231300  |
| H | 0.42659500  | -0.19998000 | 1.46234400  |
| C | -0.10544900 | -0.11945800 | -0.69983400 |
| C | 2.21386800  | 0.31418900  | 0.24829700  |
| H | 0.16639500  | 0.57366800  | -1.49119000 |
| H | 0.37348000  | -1.08807400 | -0.82807700 |
| C | -1.52966200 | -0.20191000 | -0.41958900 |
| O | 2.82062800  | 1.25354200  | -0.19074800 |
| C | -2.06127300 | -1.34961700 | 0.19546700  |
| C | -2.38933400 | 0.85964900  | -0.74600600 |
| H | -1.40307500 | -2.17069000 | 0.45219700  |
| C | -3.41244000 | -1.44101800 | 0.45145300  |
| C | -3.73861000 | 0.76536500  | -0.48936600 |
| H | -1.98703200 | 1.74638700  | -1.22058400 |
| H | -3.81984000 | -2.33056200 | 0.91066900  |
| C | -4.25174700 | -0.38422800 | 0.11246800  |
| H | -4.40154900 | 1.57635300  | -0.75644100 |
| H | -5.31155300 | -0.45351500 | 0.31702800  |
| O | 2.63316800  | -0.90828200 | 0.40470100  |
| H | 3.58183300  | -0.99058100 | 0.09409500  |
| H | -0.34916300 | 2.08210700  | 1.40950200  |
| O | 5.07319400  | -1.02793500 | -0.50354600 |
| H | 5.78759900  | -1.58307100 | -0.19088500 |
| H | 5.45009500  | -0.17362100 | -0.71819400 |

**11b**

|   |             |             |             |
|---|-------------|-------------|-------------|
| N | -1.20993800 | 1.42891200  | -0.05377500 |
| H | -1.89573400 | 1.94666600  | 0.49651200  |
| C | -1.51088200 | 0.09928100  | -0.32400700 |
| H | -1.21488400 | -0.16523300 | -1.34081500 |
| C | -0.63744600 | -0.87585800 | 0.62879300  |
| C | -2.99092000 | -0.13480500 | -0.03553000 |
| H | -0.92709600 | -0.66408200 | 1.65645500  |
| H | -0.99584900 | -1.86716500 | 0.35210500  |
| C | 0.82848400  | -0.72296500 | 0.40844400  |
| O | -3.63153100 | 0.63676200  | 0.61693400  |
| C | 1.42814300  | -1.25713100 | -0.73091300 |
| C | 1.61011700  | -0.02570700 | 1.32590000  |
| H | 0.83353500  | -1.81521200 | -1.44475400 |
| C | 2.78342000  | -1.08805000 | -0.95546600 |
| C | 2.96921500  | 0.13933700  | 1.10624800  |
| H | 1.15869200  | 0.38144200  | 2.22252700  |
| H | 3.24095300  | -1.51095300 | -1.83897300 |
| C | 3.55550000  | -0.38538800 | -0.03906200 |
| H | 3.57227900  | 0.66773100  | 1.83192600  |
| H | 4.61620700  | -0.26037700 | -0.20902100 |
| O | -3.41375700 | -1.26691700 | -0.56276100 |
| H | -4.34658500 | -1.39853400 | -0.34900200 |

|   |             |            |             |
|---|-------------|------------|-------------|
| H | -0.29979800 | 1.85219800 | -0.35191200 |
| O | 1.17976400  | 2.30606100 | -0.92500300 |
| H | 1.95904200  | 1.82017700 | -0.64176800 |
| H | 1.47921400  | 3.11142500 | -1.34664900 |

**11c**

|   |             |             |             |
|---|-------------|-------------|-------------|
| N | 2.48510700  | -2.15266100 | -0.09067700 |
| H | 3.10936200  | -1.80635500 | 0.62564300  |
| C | 1.40046700  | -1.39386200 | -0.42220200 |
| H | 0.98985200  | -1.62269300 | -1.40084500 |
| C | 0.09003100  | -1.76714400 | 0.66225600  |
| C | 1.69203100  | 0.08539700  | -0.18630400 |
| H | -0.08163600 | -2.81469400 | 0.43238000  |
| H | 0.54075500  | -1.63051400 | 1.64067600  |
| C | -1.04162300 | -0.90267200 | 0.39689800  |
| O | 2.39080800  | 0.43041900  | 0.73055400  |
| C | -1.21981800 | 0.28154100  | 1.14038700  |
| C | -1.96409300 | -1.22280700 | -0.61916400 |
| H | -0.50239500 | 0.53848600  | 1.90953400  |
| C | -2.30300000 | 1.09332800  | 0.90041000  |
| C | -3.04311800 | -0.40637500 | -0.85728300 |
| H | -1.82684900 | -2.12687800 | -1.19921200 |
| H | -2.44991600 | 1.99152400  | 1.48314100  |
| C | -3.21339400 | 0.75376600  | -0.09977100 |
| H | -3.76028600 | -0.65998100 | -1.62498800 |
| H | -4.06161400 | 1.39693000  | -0.29194200 |
| O | 1.09177700  | 0.84698300  | -1.05702200 |
| H | 1.26182600  | 1.80638600  | -0.83680700 |
| H | 2.58330600  | -3.10557400 | -0.39721300 |
| O | 1.57079400  | 3.30004900  | -0.26868800 |
| H | 1.71336500  | 4.07280300  | -0.81592000 |
| H | 2.27656400  | 3.28255100  | 0.38018400  |

**11d**

|   |             |             |             |
|---|-------------|-------------|-------------|
| N | 1.14392700  | 0.80533400  | 1.01559500  |
| H | 1.87317300  | 1.47372400  | 0.67959000  |
| C | 1.05282200  | -0.47886100 | 0.53370100  |
| H | 0.57229300  | -1.15838900 | 1.23413700  |
| C | 0.04738200  | -0.51231100 | -0.80626700 |
| C | 2.40041200  | -0.98700100 | 0.03365100  |
| H | 0.48551900  | 0.19390000  | -1.50736100 |
| H | 0.18202300  | -1.53559100 | -1.15495400 |
| C | -1.34715200 | -0.21182500 | -0.44590700 |
| O | 3.27848400  | -0.26627700 | -0.33922600 |
| C | -2.18965700 | -1.23231500 | 0.00763100  |
| C | -1.84215400 | 1.09209200  | -0.54095400 |
| H | -1.81559300 | -2.24665200 | 0.07994300  |
| C | -3.50150600 | -0.95678100 | 0.34528000  |
| C | -3.15264200 | 1.36595200  | -0.20305000 |
| H | -1.19911400 | 1.88670800  | -0.90121600 |
| H | -4.15142700 | -1.75151100 | 0.68359100  |
| C | -3.98270700 | 0.34144500  | 0.24307900  |
| H | -3.53606100 | 2.37293000  | -0.29136200 |
| H | -5.00843400 | 0.55820700  | 0.50830600  |
| O | 2.42791800  | -2.30851000 | 0.04169900  |
| H | 3.27609000  | -2.61654600 | -0.30242200 |
| H | 0.37903800  | 1.17207100  | 1.56537500  |
| O | 2.93006000  | 2.57423500  | -0.02181100 |

|   |            |            |             |
|---|------------|------------|-------------|
| H | 3.27736500 | 3.42654800 | 0.24064300  |
| H | 3.65714300 | 2.06931300 | -0.39169400 |

**12a**

|   |             |             |             |
|---|-------------|-------------|-------------|
| N | 4.10538600  | -0.63638700 | 0.37734700  |
| H | 4.36666400  | -0.13950300 | 1.21461100  |
| C | 2.75438400  | -0.44334400 | -0.03106400 |
| H | 2.59436900  | -1.03236100 | -0.93911100 |
| C | 1.67311600  | -0.87541400 | 1.01651700  |
| C | 2.45701100  | 0.99321800  | -0.46020100 |
| H | 1.87372900  | -1.92602900 | 1.23869500  |
| H | 1.82619500  | -0.30793600 | 1.93427000  |
| C | 0.27319000  | -0.74080800 | 0.53938700  |
| O | 1.32997800  | 1.38708600  | -0.63133700 |
| C | -0.63423900 | 0.15641800  | 1.16434400  |
| C | -0.19456500 | -1.54541500 | -0.53208500 |
| H | -0.27804800 | 0.76953900  | 1.98047800  |
| C | -1.92088900 | 0.26556300  | 0.74742200  |
| C | -1.47414400 | -1.45052500 | -0.97145800 |
| H | 0.48244200  | -2.24746700 | -1.00039100 |
| H | -2.61264600 | 0.95174100  | 1.21678100  |
| C | -2.36656600 | -0.53275800 | -0.34325000 |
| H | -1.85149300 | -2.05238600 | -1.78603900 |
| O | -3.57372900 | -0.47394400 | -0.80819400 |
| H | -4.15800300 | 0.18223500  | -0.34048300 |
| O | 3.53088800  | 1.73951200  | -0.63915100 |
| H | 3.24729400  | 2.61277900  | -0.93615400 |
| H | 4.37772300  | -1.60342700 | 0.44138000  |
| O | -5.12606700 | 1.25925800  | 0.41608700  |
| H | -5.41312900 | 2.04428200  | -0.05304400 |
| H | -5.88514100 | 0.94634400  | 0.91066100  |

**12b**

|   |             |             |             |
|---|-------------|-------------|-------------|
| N | 3.20882700  | -1.68758600 | -0.16275100 |
| H | 3.68092300  | -1.29797200 | 0.63867800  |
| C | 1.92464400  | -1.18578900 | -0.40851600 |
| H | 1.57540400  | -1.46357100 | -1.40050700 |
| C | 0.81436000  | -1.76090900 | 0.65487400  |
| C | 1.92883300  | 0.32693400  | -0.24965800 |
| H | 0.79118200  | -2.83278800 | 0.46827200  |
| H | 1.22529900  | -1.55533900 | 1.64066600  |
| C | -0.48864100 | -1.13652700 | 0.45702400  |
| O | 2.53251900  | 0.86965500  | 0.64154100  |
| C | -1.37607600 | -1.61651900 | -0.54254200 |
| C | -0.86354000 | 0.00971200  | 1.20667200  |
| H | -1.09164700 | -2.48241600 | -1.12584400 |
| C | -2.57451000 | -1.01432500 | -0.76621900 |
| C | -2.05645500 | 0.62522300  | 0.99785600  |
| H | -0.18042400 | 0.39137300  | 1.95405100  |
| H | -3.25551000 | -1.38832200 | -1.52025600 |
| C | -2.93068700 | 0.12028000  | 0.00374000  |
| H | -2.36342200 | 1.49308800  | 1.56390800  |
| O | -4.06616900 | 0.75623400  | -0.15793700 |
| H | -4.61716000 | 0.36878200  | -0.84589300 |
| O | 1.16527900  | 0.93065700  | -1.13411400 |
| H | 1.16154800  | 1.90394700  | -0.93570200 |
| H | 3.35614600  | -2.67357200 | -0.29212100 |
| O | 1.30165800  | 3.40321200  | -0.20924000 |

|   |            |            |             |
|---|------------|------------|-------------|
| H | 1.49966800 | 4.22898800 | -0.65141900 |
| H | 2.02234100 | 3.23437300 | 0.40403100  |

**12c**

|   |             |             |             |
|---|-------------|-------------|-------------|
| N | -3.31183900 | 0.26902800  | 0.33634300  |
| H | -3.68400400 | -0.26410500 | 1.10634300  |
| C | -1.96036800 | -0.00319800 | 0.00916000  |
| H | -1.68130100 | 0.65031200  | -0.81915700 |
| C | -0.92234000 | 0.27065100  | 1.16715300  |
| C | -1.71816800 | -1.41799900 | -0.50831800 |
| H | -1.13347300 | 1.29256300  | 1.48315000  |
| H | -1.12029400 | -0.40622700 | 1.99733000  |
| C | 0.47629800  | 0.17766000  | 0.70630500  |
| O | -0.60586700 | -1.83937600 | -0.70902800 |
| C | 1.34261500  | -0.86236400 | 1.14496400  |
| C | 0.98372300  | 1.16150400  | -0.18528000 |
| H | 0.95402700  | -1.61471100 | 1.81661300  |
| C | 2.63277800  | -0.92522700 | 0.72606500  |
| C | 2.26786400  | 1.10919900  | -0.62081200 |
| H | 0.32670000  | 1.96292700  | -0.50142700 |
| H | 3.29065400  | -1.71799000 | 1.05858000  |
| C | 3.11116200  | 0.05659000  | -0.17397100 |
| H | 2.68010300  | 1.84575200  | -1.29588400 |
| O | 4.33705800  | 0.05606400  | -0.63698500 |
| H | 4.86130300  | -0.67951600 | -0.30304800 |
| O | -2.81797400 | -2.11620900 | -0.72066100 |
| H | -2.56838200 | -2.98193100 | -1.06666300 |
| H | -3.49019900 | 1.25468300  | 0.44829400  |
| O | -1.94136700 | 3.15229700  | -0.30429800 |
| H | -2.36542400 | 3.40097200  | -1.12656400 |
| H | -1.94300100 | 3.95097800  | 0.22421700  |

**12d**

|   |             |             |             |
|---|-------------|-------------|-------------|
| N | 3.04327200  | 1.28312200  | 0.14846900  |
| H | 3.53162300  | 0.58430000  | -0.40630300 |
| C | 1.69834200  | 1.01486700  | 0.41577700  |
| H | 1.24620000  | 1.82327800  | 0.98442800  |
| C | 0.82554600  | 0.86120500  | -0.97829000 |
| C | 1.55219700  | -0.29101600 | 1.18618200  |
| H | 0.90385100  | 1.84458700  | -1.43608900 |
| H | 1.36861900  | 0.12001200  | -1.56162400 |
| C | -0.55193400 | 0.48138200  | -0.70497100 |
| O | 2.06673600  | -1.32986500 | 0.87474800  |
| C | -1.52379700 | 1.46201200  | -0.37723500 |
| C | -0.93950300 | -0.88374700 | -0.70456300 |
| H | -1.23440300 | 2.50475000  | -0.36310900 |
| C | -2.81062600 | 1.11417900  | -0.10011400 |
| C | -2.22101600 | -1.24958900 | -0.43163300 |
| H | -0.19917700 | -1.63624900 | -0.94222400 |
| H | -3.55318800 | 1.86662000  | 0.13356200  |
| C | -3.17624800 | -0.25175300 | -0.12423000 |
| H | -2.53997700 | -2.28210000 | -0.44905100 |
| O | -4.39712600 | -0.66434400 | 0.13185700  |
| H | -5.00067600 | 0.05893600  | 0.32877500  |
| O | 0.74938700  | -0.14820300 | 2.23490500  |
| H | 0.69129600  | -0.99461600 | 2.69593500  |
| H | 3.26645400  | 2.23208600  | -0.10032400 |
| O | 3.53115300  | -1.04961800 | -1.52265800 |

|   |            |             |             |
|---|------------|-------------|-------------|
| H | 4.22730900 | -1.51566800 | -1.98414700 |
| H | 3.27020200 | -1.59679100 | -0.77548000 |

**13a**

|   |             |             |             |
|---|-------------|-------------|-------------|
| N | 1.48508700  | -1.67971500 | -0.59710700 |
| H | 2.35276100  | -1.62631900 | -0.07765400 |
| C | 0.65971600  | -0.62676200 | -0.57085000 |
| H | -0.08192900 | -0.56767600 | -1.35933100 |
| C | -0.58161700 | -0.86944200 | 0.92424600  |
| C | 1.33901400  | 0.64503400  | -0.12212500 |
| H | -1.07315600 | -1.75532400 | 0.52621200  |
| H | 0.16316400  | -1.02021700 | 1.69966700  |
| O | -1.29803700 | 0.20569500  | 1.08276500  |
| O | 2.32880400  | 0.61741300  | 0.54833800  |
| H | -2.10720100 | 0.21055600  | 0.50336300  |
| O | 0.69818100  | 1.71580600  | -0.55320600 |
| H | 1.14521200  | 2.50857000  | -0.22926400 |
| H | 1.25909800  | -2.53188200 | -1.08194600 |
| O | -3.33404200 | 0.09346100  | -0.55508200 |
| H | -3.53927300 | 0.85887800  | -1.09478500 |
| H | -4.17621100 | -0.27056100 | -0.27666800 |

**13b**

|   |             |             |             |
|---|-------------|-------------|-------------|
| N | -1.83687200 | -1.45086100 | 0.04187200  |
| H | -1.47673400 | -1.74996100 | 0.94405100  |
| C | -1.11652500 | -0.53258300 | -0.64246400 |
| H | -1.22423500 | -0.59407700 | -1.72414400 |
| C | -1.73435400 | 1.10447300  | -0.40354000 |
| C | 0.31295600  | -0.44101200 | -0.08833500 |
| H | -1.14229100 | 1.62001800  | -1.15600500 |
| H | -2.78894700 | 1.00356700  | -0.65314000 |
| O | -1.45347500 | 1.56760400  | 0.81735900  |
| O | 0.56423000  | -0.92306600 | 0.98103000  |
| H | -2.14946900 | 1.39058900  | 1.45547200  |
| O | 1.09550300  | 0.20381400  | -0.89820900 |
| H | 2.03023300  | 0.24984800  | -0.53167200 |
| H | -2.66462000 | -1.88654500 | -0.33381500 |
| O | 3.49837700  | 0.22791400  | 0.06391800  |
| H | 3.64187600  | -0.08549700 | 0.95721400  |
| H | 4.22274900  | 0.81269900  | -0.15781200 |

**13c**

|   |             |             |             |
|---|-------------|-------------|-------------|
| N | -1.04230200 | -0.89392400 | 0.28006400  |
| H | -0.76912400 | -1.65228000 | 0.89864400  |
| C | -0.05585800 | -0.11490700 | -0.23372000 |
| H | -0.29835300 | 0.32685700  | -1.19818100 |
| C | 0.09185200  | 1.35117700  | 0.70976900  |
| C | 1.29618000  | -0.79909800 | -0.12143700 |
| H | -0.93984800 | 1.64253900  | 0.87774400  |
| H | 0.59942100  | 1.01841900  | 1.61643900  |
| O | 0.72126400  | 2.28579800  | -0.01492500 |
| O | 1.45681300  | -1.77986900 | 0.53970700  |
| H | 1.67492200  | 2.16236000  | -0.02122700 |
| O | 2.23216000  | -0.13917100 | -0.79059100 |
| H | 3.07529500  | -0.60403700 | -0.70511100 |
| H | -2.04017200 | -0.70319900 | 0.08211900  |
| O | -3.61461200 | -0.14829800 | -0.33097700 |
| H | -4.05073000 | -0.34010800 | -1.16232400 |

H -4.31334700 0.03620200 0.29806300

**13d**

N 1.40615500 1.83381200 0.08555400  
H 1.81054700 1.99644600 0.99655900  
C 1.19804000 0.57139200 -0.37868400  
H 1.01305600 0.54553200 -1.45246500  
C 2.15283300 -0.50208800 0.10224400  
C -0.37978700 0.10226100 0.18480100  
H 3.14789400 -0.25030000 -0.28147000  
H 2.18439900 -0.50611100 1.19735800  
O 1.66547100 -1.69737700 -0.42964100  
O -0.45451600 -0.29877400 1.29104800  
H 2.20416100 -2.43572300 -0.14603000  
O -1.21874400 0.33515800 -0.74902400  
H -2.17536100 0.09506600 -0.46698200  
H 1.03980200 2.63589600 -0.40364900  
O -3.59398700 -0.19642700 -0.04702800  
H -3.78884600 -0.78786100 0.68148500  
H -4.29105400 -0.29965300 -0.69669700

**13e**

N -0.86589800 -0.99626600 0.94403100  
H -1.73155700 -0.75325700 0.40930900  
C 0.32096600 -0.37251000 0.72190000  
H 1.03440800 -0.47193700 1.53658100  
C 1.19299100 -1.21535400 -0.54957700  
C 0.15353300 1.04153700 0.18858700  
H 1.00480100 -2.26294900 -0.33991200  
H 0.70080300 -0.86698200 -1.45895100  
O 2.50054400 -0.95260400 -0.43730600  
O -0.88944400 1.49412300 -0.17257000  
H 2.72897400 -0.08573300 -0.78627700  
O 1.32715800 1.66361600 0.14507600  
H 1.19990900 2.56444000 -0.18085700  
H -0.90140900 -1.78220200 1.57770300  
O -3.05318300 -0.42928600 -0.55617400  
H -3.93327400 -0.80222700 -0.60963500  
H -3.12691000 0.50588900 -0.75384100

**14a**

N 1.10938500 2.25463100 -0.22200600  
H 0.58781000 2.71985800 0.51126900  
C 0.81424900 0.95452800 -0.49964300  
H 1.09954700 0.64713600 -1.50049500  
C 1.75645900 -0.06506700 0.54299900  
C -0.63295900 0.63691000 -0.10170000  
H 2.75902800 0.34506900 0.47288000  
H 1.32238300 0.09696300 1.52550900  
S 1.79646800 -1.71918500 0.02430100  
O -1.18255600 1.29095900 0.74199000  
H 0.60265300 -2.10115700 0.50245000  
O -1.10053800 -0.39158600 -0.74953300  
H -2.04425000 -0.58515700 -0.46203400  
H 1.85921800 2.74618700 -0.67965300  
O -3.49669000 -0.88153600 0.11453600  
H -3.86203500 -0.20659800 0.68863000  
H -4.22176200 -1.23867400 -0.39920700

**14b**

N 1.44014500 -0.81037900 -0.37091600  
H 1.30784400 -1.45844500 -1.14044300  
C 0.31550000 -0.31085100 0.23537300  
H 0.49652300 0.00764500 1.25895300  
C -0.10484800 1.10710100 -0.58366000  
C -0.84350200 -1.29052500 0.06442200  
H 0.74888400 1.76038400 -0.43709400  
H -0.20841100 0.81878400 -1.62638500  
S -1.61914000 1.80674500 -0.04854400  
O -0.97153500 -1.92779700 -0.93830200  
H -1.16520900 2.37964300 1.07614000  
O -1.62160300 -1.31304400 1.12819700  
H -2.35892600 -1.91970400 0.97926700  
H 2.37644000 -0.43082900 -0.15982800  
O 3.80405700 0.43247300 0.34430900  
H 4.32210000 0.18289500 1.11082600  
H 4.41573700 0.85695700 -0.25876200

**14c**

N -1.24663800 -0.57631300 1.31900400  
H -2.01719100 -0.64092800 0.61809000  
C -0.02492200 -0.04813100 0.97033100  
H 0.59596700 0.17486400 1.83348600  
C 0.79507700 -1.22379000 0.09217800  
C -0.18998500 1.14854900 0.02816100  
H 0.90551700 -2.06109800 0.77297200  
H 0.13401300 -1.47399100 -0.73383400  
S 2.32406700 -0.65792100 -0.55705600  
O -0.93802300 1.14093200 -0.90424400  
H 3.05335400 -0.78969800 0.56081300  
O 0.60078700 2.13730400 0.39430900  
H 0.51180300 2.87321300 -0.22591300  
H -1.34115500 -1.08833400 2.18432500  
O -3.03346600 -0.83470300 -0.70614300  
H -3.94378400 -1.11214300 -0.80934400  
H -2.87254200 -0.12898100 -1.33611400

**14d**

N 1.32612600 1.75289100 -0.73684600  
H 2.24128400 1.47438300 -1.06630100  
C 0.54754900 0.82515800 -0.10563600  
H -0.21949100 1.25112300 0.53671500  
C -0.39404400 0.00304100 -1.30200700  
C 1.43084300 -0.23161800 0.54631900  
H -1.03095200 0.80225600 -1.66615500  
H 0.32088900 -0.33459400 -2.04672800  
S -1.27842100 -1.34689700 -0.67373700  
O 2.46480300 -0.57490100 0.05700500  
H -2.20030200 -0.61551300 -0.00775700  
O 0.89755700 -0.68428900 1.66832900  
H 1.46899900 -1.36866300 2.04092500  
H 0.96242500 2.64648600 -1.02266400  
O -2.59406600 1.14857000 0.98474400  
H -2.68987200 1.02934400 1.93122000  
H -3.33356800 1.70075700 0.72578200

**15a**

|    |             |             |             |
|----|-------------|-------------|-------------|
| N  | 0.54008300  | 2.67171200  | -0.05294000 |
| H  | 0.70810600  | 2.80019300  | -1.03778800 |
| C  | 0.00480100  | 1.41360300  | 0.32481600  |
| H  | -0.18564100 | 1.44001000  | 1.40363400  |
| C  | -1.31319000 | 1.03065000  | -0.38274900 |
| C  | 1.00383500  | 0.26433600  | 0.15735300  |
| H  | -2.12447400 | 1.67965400  | -0.05969700 |
| H  | -1.21783000 | 1.09607000  | -1.46621700 |
| O  | 0.60589500  | -0.90149800 | 0.11479300  |
| O  | 2.23995500  | 0.59314400  | 0.10335600  |
| H  | 2.84545700  | -0.20479100 | 0.01775500  |
| H  | 0.08241500  | 3.46915900  | 0.35443800  |
| O  | 3.87653900  | -1.39395400 | -0.19064900 |
| H  | 3.67601600  | -2.30644100 | 0.01716700  |
| H  | 4.82436100  | -1.28448100 | -0.10978100 |
| Se | -1.83830500 | -0.80424000 | -0.02946000 |
| H  | -1.83839900 | -0.68028500 | 1.43618600  |

**15b**

|    |             |             |             |
|----|-------------|-------------|-------------|
| N  | -2.35053900 | -0.19255700 | 1.49277100  |
| H  | -2.68610400 | -1.14235800 | 1.46965800  |
| C  | -1.16855700 | 0.06195400  | 0.74667900  |
| H  | -0.84722100 | 1.08950600  | 0.95026700  |
| C  | 0.01436800  | -0.87759800 | 1.06717300  |
| C  | -1.40042600 | 0.05750200  | -0.76273500 |
| H  | 0.37426200  | -0.69097000 | 2.07736300  |
| H  | -0.27074600 | -1.92541200 | 0.98241300  |
| O  | -0.48027200 | -0.08823100 | -1.55088600 |
| O  | -2.63112000 | 0.25979100  | -1.13976100 |
| H  | -2.68110700 | 0.27718800  | -2.10508900 |
| H  | -2.34193100 | 0.17074800  | 2.43051900  |
| O  | 1.16098700  | 2.64270600  | 0.37363700  |
| H  | 1.61151900  | 3.15273100  | 1.04897400  |
| H  | 1.08564800  | 3.22680500  | -0.38292200 |
| Se | 1.51623400  | -0.63582600 | -0.13949800 |
| H  | 1.58843000  | 0.84247500  | 0.05174500  |

**15c**

|    |             |             |             |
|----|-------------|-------------|-------------|
| N  | -1.94869700 | -1.11381800 | 1.16528800  |
| H  | -2.25077200 | -1.56816900 | 0.31651700  |
| C  | -0.75101500 | -0.36933800 | 1.02074800  |
| H  | -0.41646100 | -0.05936400 | 2.01758700  |
| C  | 0.39455900  | -1.14767800 | 0.33932100  |
| C  | -0.94969800 | 0.95747100  | 0.28926000  |
| H  | 0.77242900  | -1.92489500 | 1.00041200  |
| H  | 0.04664400  | -1.59480300 | -0.58968300 |
| O  | -0.02232400 | 1.53713400  | -0.25504100 |
| O  | -2.14739400 | 1.46342400  | 0.35938000  |
| H  | -2.15960000 | 2.33100600  | -0.06696800 |
| H  | -1.97230900 | -1.72620800 | 1.96243300  |
| O  | -2.08601200 | -0.79684400 | -1.79606900 |
| H  | -1.98314900 | -1.18049800 | -2.66754600 |
| H  | -2.96502300 | -0.41526500 | -1.79394100 |
| Se | 1.89119500  | -0.02513800 | -0.17259400 |
| H  | 2.15123500  | 0.51716100  | 1.17022400  |

**15d**

|    |             |             |             |
|----|-------------|-------------|-------------|
| N  | 0.21317400  | 2.75710200  | 0.19781300  |
| H  | 0.82214800  | 2.99694800  | -0.57227200 |
| C  | 0.01385700  | 1.42944400  | 0.48865600  |
| H  | -0.30809600 | 1.27028100  | 1.51324800  |
| C  | -1.22251700 | 0.84539400  | -0.49048000 |
| C  | 1.25162500  | 0.61080600  | 0.10193400  |
| H  | -2.05304500 | 1.53070600  | -0.35257100 |
| H  | -0.84172100 | 0.88605000  | -1.50656500 |
| O  | 1.98034200  | 0.98147000  | -0.77734100 |
| O  | 1.34484500  | -0.48789800 | 0.80124700  |
| H  | 2.14527200  | -1.01638600 | 0.50682200  |
| H  | -0.30177100 | 3.48750400  | 0.65796300  |
| O  | 3.38544400  | -1.81566300 | -0.11468000 |
| H  | 3.98416900  | -2.36808400 | 0.38886800  |
| H  | 3.92098200  | -1.29321200 | -0.71413500 |
| Se | -1.82486700 | -0.87971700 | -0.01417200 |
| H  | -0.75751000 | -1.62029200 | -0.69865200 |

**15e**

|    |             |             |             |
|----|-------------|-------------|-------------|
| N  | -1.77723300 | -0.51460400 | 1.38091900  |
| H  | -2.46324600 | -0.80188100 | 0.65868600  |
| C  | -0.61130700 | 0.12468100  | 1.00619200  |
| H  | -0.05415700 | 0.49391200  | 1.86144500  |
| C  | 0.33031500  | -0.99537500 | 0.22687200  |
| C  | -0.89364600 | 1.22993400  | -0.01739600 |
| H  | 0.44176600  | -1.82926000 | 0.91287800  |
| H  | -0.22636600 | -1.29153900 | -0.65731700 |
| O  | -1.60918900 | 1.07980400  | -0.96357300 |
| O  | -0.22412400 | 2.32739200  | 0.28621100  |
| H  | -0.40824100 | 3.01220500  | -0.37044500 |
| H  | -1.84523400 | -0.92553000 | 2.29947500  |
| O  | -3.26251100 | -1.30180700 | -0.78397800 |
| H  | -4.06718700 | -1.79208000 | -0.95270200 |
| H  | -3.23118600 | -0.57882100 | -1.41398000 |
| Se | 2.07158000  | -0.35457100 | -0.18269900 |
| H  | 1.67516300  | 0.37206800  | -1.39598900 |

**16a**

|   |             |             |             |
|---|-------------|-------------|-------------|
| N | 1.27740100  | 1.85381800  | 0.09402300  |
| H | 0.96157200  | 2.05034900  | 1.03419200  |
| C | 0.63181800  | 0.94788700  | -0.62068900 |
| H | 0.85787600  | 0.86578400  | -1.67513700 |
| C | 1.45318200  | -1.00843700 | -0.00747500 |
| C | -0.71173100 | 0.53961700  | -0.10648600 |
| H | 0.60289000  | -1.54080900 | -0.42854600 |
| C | 2.75432500  | -1.04764400 | -0.70754700 |
| O | 1.51337800  | -0.88201600 | 1.29309500  |
| O | -0.96573300 | 0.62651700  | 1.07413600  |
| H | 3.43089600  | -0.28492300 | -0.32468000 |
| H | 3.21308800  | -2.02176900 | -0.51023500 |
| H | 2.63082200  | -0.95022300 | -1.78325300 |
| H | 0.64145000  | -0.92043100 | 1.70888300  |
| O | -1.47607800 | 0.05342000  | -1.04312400 |
| H | -2.35945200 | -0.23267800 | -0.66622900 |
| H | 2.11135800  | 2.30582600  | -0.23976700 |
| O | -3.73137500 | -0.74468900 | -0.00706300 |
| H | -3.97816600 | -0.37360800 | 0.84092400  |
| H | -4.54123300 | -0.88863200 | -0.49748700 |

**16b**

|   |             |             |             |
|---|-------------|-------------|-------------|
| N | -0.69638200 | -1.08095100 | 0.55708400  |
| H | -0.32376400 | -1.23531600 | 1.48417200  |
| C | 0.12206700  | -0.65895800 | -0.38510100 |
| H | -0.22664600 | -0.66093500 | -1.40879500 |
| C | 0.18809100  | 1.53874900  | -0.16361200 |
| C | 1.57869500  | -0.75055100 | -0.09305300 |
| H | 1.10758300  | 1.63596400  | -0.73685000 |
| C | -1.09755200 | 1.92891900  | -0.78100300 |
| O | 0.26205000  | 1.68862400  | 1.13617600  |
| O | 2.00510400  | -0.74160400 | 1.03186300  |
| H | -1.94079700 | 1.49630800  | -0.24421600 |
| H | -1.18558200 | 3.01802400  | -0.71982300 |
| H | -1.13323700 | 1.64599500  | -1.82993900 |
| H | 1.14668000  | 1.51743900  | 1.48165300  |
| O | 2.30586500  | -0.77793900 | -1.19982100 |
| H | 3.24166700  | -0.83690000 | -0.96833700 |
| H | -1.70566700 | -1.16388900 | 0.39512300  |
| O | -3.43429100 | -1.11783600 | -0.05815300 |
| H | -4.12568900 | -0.85013400 | 0.54848800  |
| H | -3.83750300 | -1.75881600 | -0.64498300 |

**16c**

|   |             |             |             |
|---|-------------|-------------|-------------|
| N | 1.28008700  | 1.80949800  | 0.11012100  |
| H | 0.82574600  | 2.11887200  | 0.96154900  |
| C | 0.69026700  | 0.84036200  | -0.58517600 |
| H | 0.93840500  | 0.76011900  | -1.63750200 |
| C | 1.49372300  | -0.96483200 | -0.12997900 |
| C | -0.72937000 | 0.55874700  | -0.13663700 |
| H | 0.89631600  | -1.46591000 | -0.88590000 |
| C | 2.95264100  | -0.78748600 | -0.37036600 |
| O | 1.07300900  | -1.27182600 | 1.08276300  |
| O | -1.14564700 | 1.04889400  | 0.87865000  |
| H | 3.40648900  | -0.12102800 | 0.36438300  |
| H | 3.42939000  | -1.76730700 | -0.28142900 |
| H | 3.15045600  | -0.41328300 | -1.37236400 |
| H | 1.70151200  | -1.02201200 | 1.76819000  |
| O | -1.34798100 | -0.24641600 | -0.95396600 |
| H | -2.27779800 | -0.42807300 | -0.62643900 |
| H | 2.10466200  | 2.28626400  | -0.21212200 |
| O | -3.71807200 | -0.71227800 | 0.01499800  |
| H | -3.94236400 | -0.17623700 | 0.77678700  |
| H | -4.52745300 | -0.86562000 | -0.47260600 |

**16d**

|   |             |             |             |
|---|-------------|-------------|-------------|
| N | -0.57293300 | -1.02450500 | 1.70215200  |
| H | -1.32493300 | -1.65877600 | 1.47004200  |
| C | -0.34241300 | 0.02338300  | 0.92568500  |
| H | 0.34946700  | 0.79124600  | 1.24812500  |
| C | 0.98387500  | -0.70000200 | -0.69836600 |
| C | -1.42283300 | 0.35371400  | -0.03942300 |
| H | 0.85569500  | 0.23199600  | -1.24365300 |
| C | 2.23834500  | -0.93371200 | 0.04382300  |
| O | 0.37660900  | -1.77554600 | -1.12630700 |
| O | -2.20487500 | -0.47087600 | -0.43283300 |
| H | 2.14355300  | -1.77935500 | 0.72329400  |
| H | 3.01216500  | -1.18671900 | -0.68819600 |

|   |             |             |             |
|---|-------------|-------------|-------------|
| H | 2.55265700  | -0.03583200 | 0.56733500  |
| H | -0.37972600 | -1.58817800 | -1.69477600 |
| O | -1.37882200 | 1.62050000  | -0.43805200 |
| H | -2.10648700 | 1.77871700  | -1.05321800 |
| H | 0.02083500  | -1.24668800 | 2.48260300  |
| O | 1.56612800  | 2.32635800  | 0.09617800  |
| H | 2.37754200  | 2.82350200  | 0.20383800  |
| H | 0.89559300  | 2.97783000  | -0.11266100 |

**17a**

|   |             |             |             |
|---|-------------|-------------|-------------|
| N | 1.19909100  | 2.70331700  | -0.00219500 |
| H | 1.31592100  | 2.81575400  | -0.99837800 |
| C | 0.32791300  | 1.61642100  | 0.35232900  |
| H | 0.23513100  | 1.62417800  | 1.44598800  |
| C | -1.09137500 | 1.72033300  | -0.23464400 |
| C | 0.99502500  | 0.27306800  | 0.07686200  |
| H | -1.46408300 | 2.71020800  | 0.02850400  |
| H | -1.04641400 | 1.69376700  | -1.32621200 |
| C | -2.10672600 | 0.70469500  | 0.28905600  |
| O | 0.35998300  | -0.76358700 | -0.13606200 |
| H | -1.98056500 | 0.50662100  | 1.35300300  |
| H | -3.12668600 | 1.05534600  | 0.12289100  |
| S | -1.97638600 | -0.84924400 | -0.60079800 |
| C | -2.18858700 | -2.08531500 | 0.66173400  |
| H | -3.16088700 | -1.94447700 | 1.13396600  |
| H | -2.14620500 | -3.05788900 | 0.17822300  |
| H | -1.38843000 | -1.98886100 | 1.39281800  |
| O | 2.28119100  | 0.27782400  | 0.14059800  |
| H | 2.67033600  | -0.63192000 | 0.01949400  |
| H | 0.90349800  | 3.57889600  | 0.39969300  |
| O | 3.48352800  | -2.05555500 | -0.05675300 |
| H | 4.39921200  | -2.08690800 | 0.22255900  |
| H | 3.40258900  | -2.65468400 | -0.79869900 |

**17b**

|   |             |             |             |
|---|-------------|-------------|-------------|
| N | 0.14795500  | 1.99326000  | -0.07483900 |
| H | 0.59168600  | 2.10543500  | -0.98019900 |
| C | 0.55341300  | 0.75946200  | 0.54988700  |
| H | 0.53574400  | 0.87019800  | 1.63387300  |
| C | -0.43431600 | -0.35866800 | 0.14300100  |
| C | 1.95742800  | 0.32409900  | 0.11969600  |
| H | -0.27001500 | -0.60476900 | -0.90919500 |
| H | -0.27232500 | -1.26040200 | 0.72964600  |
| C | -1.84076900 | 0.20685100  | 0.33056000  |
| O | 2.48844900  | 0.77362800  | -0.86314000 |
| H | -2.15784800 | 0.28767400  | 1.37053100  |
| H | -1.74373700 | 1.25559000  | -0.07073700 |
| S | -3.04287200 | -0.62640600 | -0.62009700 |
| C | -4.54481000 | -0.43515600 | 0.31803900  |
| H | -4.72665500 | 0.62559800  | 0.49370700  |
| H | -5.35438800 | -0.86779700 | -0.26408300 |
| H | -4.44269900 | -0.95582500 | 1.27076900  |
| O | 2.44804800  | -0.59991300 | 0.91069600  |
| H | 3.33657000  | -0.88607000 | 0.56759100  |
| H | 0.33634600  | 2.81048900  | 0.48568100  |
| O | 4.72314500  | -1.22132000 | -0.26984500 |
| H | 4.79358800  | -0.55709900 | -0.95842100 |
| H | 5.60118400  | -1.35203600 | 0.08746600  |



**17c**

|   |             |             |             |
|---|-------------|-------------|-------------|
| N | -2.88179500 | -0.69355900 | 0.55834400  |
| H | -3.14010800 | -1.44268800 | -0.06692400 |
| C | -1.49035500 | -0.34019800 | 0.48783700  |
| H | -1.29685400 | 0.40674600  | 1.26726800  |
| C | -0.51763800 | -1.51305300 | 0.71686200  |
| C | -1.18537900 | 0.42635000  | -0.78824000 |
| H | -0.84917800 | -2.01098000 | 1.62792700  |
| H | -0.61786300 | -2.24865900 | -0.08496900 |
| C | 0.94755200  | -1.12970200 | 0.93201800  |
| O | -0.07502300 | 0.50152000  | -1.29614500 |
| H | 1.04430100  | -0.21321500 | 1.51146400  |
| H | 1.48424600  | -1.93469300 | 1.43789000  |
| S | 1.80673600  | -0.89390300 | -0.62630100 |
| C | 2.80070000  | 0.55248200  | -0.34650800 |
| H | 3.61998600  | 0.27782900  | 0.32032300  |
| H | 3.19787500  | 0.86848000  | -1.30784500 |
| H | 2.18488200  | 1.32549800  | 0.11161900  |
| O | -2.20498500 | 1.06787000  | -1.30044700 |
| H | -1.91534000 | 1.54427700  | -2.08922900 |
| H | -3.17046900 | -0.92765400 | 1.49483100  |
| O | 0.57756500  | 2.19161500  | 1.61916200  |
| H | 0.22761700  | 2.97212500  | 1.18790100  |
| H | 0.78595400  | 2.47698200  | 2.50978100  |

**17d**

|   |             |             |             |
|---|-------------|-------------|-------------|
| N | 0.80002900  | 2.63131100  | -0.01616400 |
| H | 1.41588500  | 2.72838800  | -0.81063800 |
| C | 0.53760100  | 1.34865700  | 0.45717000  |
| H | 0.34188700  | 1.33988000  | 1.52999300  |
| C | -0.78607900 | 0.79557400  | -0.26242600 |
| C | 1.70866800  | 0.43537200  | 0.09118600  |
| H | -1.55595300 | 1.55268000  | -0.12581700 |
| H | -0.56889500 | 0.70558000  | -1.32567800 |
| C | -1.23326000 | -0.55178800 | 0.34310600  |
| O | 2.42491900  | 0.68644500  | -0.84113900 |
| H | -0.48636100 | -1.32251300 | 0.17138300  |
| H | -1.42229600 | -0.47007700 | 1.41213300  |
| S | -2.69948500 | -1.01615500 | -0.53664100 |
| C | -3.99628300 | -0.20119800 | 0.38934500  |
| H | -3.84908700 | 0.87808900  | 0.38933500  |
| H | -4.93457100 | -0.43153300 | -0.10962100 |
| H | -4.01550200 | -0.57786700 | 1.41087800  |
| O | 1.78604300  | -0.61367300 | 0.87294100  |
| H | 2.55011000  | -1.18795600 | 0.58245400  |
| H | 0.28481800  | 3.43104800  | 0.30527600  |
| O | 3.76413700  | -2.03809600 | -0.08855800 |
| H | 4.20250400  | -1.52357600 | -0.76863800 |
| H | 4.44436000  | -2.51994000 | 0.38210200  |

**TS-Ala**

|   |             |             |             |
|---|-------------|-------------|-------------|
| N | 0.96081700  | -0.41648000 | 1.11577400  |
| H | 0.72891000  | -1.06506400 | 1.86626800  |
| C | 0.26238700  | 0.67228600  | 0.94011500  |
| H | -0.46550800 | 0.92537500  | 1.72037200  |
| C | 0.65405100  | 1.71187900  | -0.04686700 |
| C | -1.70580000 | -0.14038000 | -0.20493200 |

|   |             |             |             |
|---|-------------|-------------|-------------|
| H | 1.32056900  | 1.30497600  | -0.81968600 |
| H | -0.23164100 | 2.17751900  | -0.50056300 |
| H | 1.19007100  | 2.50669300  | 0.50469000  |
| O | -2.27504000 | 0.59711100  | -0.92632700 |
| O | -1.86631000 | -1.37201700 | 0.18643900  |
| H | -2.66825400 | -1.77945400 | -0.21168800 |
| H | 1.71905200  | -0.67207900 | 0.44408400  |
| O | 2.86341000  | -0.73697600 | -0.83839100 |
| H | 2.84473200  | -1.35490500 | -1.58438300 |
| H | 3.79605100  | -0.49535700 | -0.73318700 |

Imaginary Frequency: -78.42 cm<sup>-1</sup>**TS-Gly**

|   |             |             |             |
|---|-------------|-------------|-------------|
| N | 1.48095500  | 1.17337000  | 0.47684800  |
| H | 1.59038400  | 1.70941100  | 1.33971300  |
| C | 0.67974100  | 1.55433600  | -0.44900900 |
| C | -1.40858700 | -0.14682100 | 0.01059300  |
| H | 0.12737300  | 2.49696600  | -0.37383900 |
| H | 0.62654800  | 0.95496800  | -1.36213400 |
| O | -0.83996500 | -1.14748300 | 0.30051900  |
| O | -2.64932200 | 0.19952200  | -0.11076700 |
| H | -3.26645800 | -0.54386300 | 0.07804000  |
| H | 1.94129700  | 0.22417600  | 0.36623000  |
| O | 2.08441400  | -1.27662100 | -0.23457600 |
| H | 1.35844500  | -1.87938900 | -0.00877800 |
| H | 2.86777900  | -1.82429400 | -0.38807300 |

Imaginary Frequency: -43.57 cm<sup>-1</sup>**TS-Cys**

|   |             |             |             |
|---|-------------|-------------|-------------|
| N | -1.57150000 | -0.01323800 | 1.43296100  |
| H | -2.24509600 | -0.02801400 | 0.63101600  |
| C | -0.39348700 | -0.54260300 | 1.27967800  |
| H | 0.33512100  | -0.42167600 | 2.09049600  |
| C | -0.12657800 | -1.55011600 | 0.20749200  |
| C | 0.68688600  | 1.30929200  | -0.02354000 |
| H | -0.19494900 | -2.55321600 | 0.66573100  |
| H | -0.89441700 | -1.48069100 | -0.57711200 |
| S | 1.48874900  | -1.35089600 | -0.62874400 |
| O | -0.11945900 | 1.67504200  | -0.81584300 |
| H | 2.27005200  | -1.58767800 | 0.45302400  |
| O | 1.78627900  | 1.82528600  | 0.44137100  |
| H | 1.99452200  | 2.68198300  | 0.00621400  |
| H | -1.76957000 | 0.58890500  | 2.23103800  |
| O | -2.63304900 | 0.05971200  | -1.03266700 |
| H | -3.45602100 | -0.04264200 | -1.53210400 |
| H | -2.13022200 | 0.77028700  | -1.46380400 |

Imaginary Frequency: -66.84 cm<sup>-1</sup>**TS-Ser**

|   |             |             |             |
|---|-------------|-------------|-------------|
| N | 0.82837400  | -1.37802500 | 0.92651900  |
| H | 0.53957200  | -1.66912200 | 1.85986000  |
| C | -0.02543000 | -1.08524500 | -0.00778200 |
| H | 0.40548400  | -0.83641300 | -0.98333700 |
| C | -1.49209900 | -1.36357900 | 0.05376300  |
| C | -0.18195700 | 1.35168600  | 0.07727500  |

|   |             |             |             |
|---|-------------|-------------|-------------|
| H | -1.59523800 | -2.45931600 | -0.11871500 |
| H | -1.87757700 | -1.15823200 | 1.07377900  |
| O | -2.09041800 | -0.59452400 | -0.94582900 |
| O | 0.77781700  | 1.85310900  | -0.40064000 |
| H | -3.03363300 | -0.79751600 | -1.00493100 |
| O | -1.23036800 | 1.78133800  | 0.70491600  |
| H | -1.23894400 | 2.76220900  | 0.77719300  |
| H | 1.82643900  | -1.16772500 | 0.70798700  |
| O | 2.89472800  | -0.34736600 | -0.38975400 |
| H | 2.80161300  | 0.60740800  | -0.53192500 |
| H | 3.75651300  | -0.59273800 | -0.75462500 |

Imaginary Frequency: -63.82 cm<sup>-1</sup>

**PRC-Ala**

|   |             |             |             |
|---|-------------|-------------|-------------|
| N | 1.37822600  | 0.01733800  | 1.07803500  |
| H | 1.10210300  | -0.28007400 | 2.00315100  |
| C | 0.87195800  | 1.06975800  | 0.56054900  |
| H | 0.15868200  | 1.62469000  | 1.15889100  |
| C | 1.21966300  | 1.55990000  | -0.77727900 |
| C | -2.42771400 | -0.55017300 | 0.10969900  |
| H | 1.93635100  | 0.92039300  | -1.28603300 |
| H | 0.29769200  | 1.63980800  | -1.35663400 |
| H | 1.61513700  | 2.57445800  | -0.68554400 |
| O | -1.77258100 | 0.41937200  | -0.09650700 |
| O | -3.66278300 | -0.83320900 | -0.17217200 |
| H | -4.10361500 | -0.09831800 | -0.62987800 |
| H | 2.06237800  | -0.56519800 | 0.56369400  |
| O | 3.20232400  | -1.43226300 | -0.41526000 |
| H | 3.01111700  | -2.23774100 | -0.89739300 |
| H | 4.15345400  | -1.40749600 | -0.30279800 |

**PRC-Gly**

|   |             |             |             |
|---|-------------|-------------|-------------|
| N | -3.06273500 | -0.14395500 | 0.50726900  |
| H | -3.42474700 | -0.24165500 | 1.44869800  |
| C | -3.70272100 | -0.61850600 | -0.47517300 |
| C | 2.69577800  | 0.14323800  | -0.21827800 |
| H | -4.64451500 | -1.13459000 | -0.32856100 |
| H | -3.29190100 | -0.50004700 | -1.47146700 |
| O | 1.64520800  | -0.18902200 | 0.23462100  |
| O | 3.88087600  | -0.35965900 | -0.08536900 |
| H | 3.87940100  | -1.14027500 | 0.49309500  |
| H | -2.13680200 | 0.36221100  | 0.35665900  |
| O | -0.81218800 | 1.03699500  | -0.11370600 |
| H | 0.06253000  | 0.62469300  | -0.00390800 |
| H | -0.67432000 | 1.98245400  | -0.16905200 |

**PRC-Cys**

|   |             |             |             |
|---|-------------|-------------|-------------|
| N | -1.78736100 | 1.60291600  | 0.82090700  |
| H | -0.89940200 | 1.79295300  | 0.29943200  |
| C | -2.60309400 | 0.70227600  | 0.42377700  |
| H | -3.50788500 | 0.54233900  | 1.00189100  |
| C | -2.33888400 | -0.16554400 | -0.73813000 |
| C | 3.17154000  | -0.51453400 | 0.01462200  |
| H | -3.21523300 | -0.27061800 | -1.37184100 |
| H | -1.49082600 | 0.18203300  | -1.32369800 |
| S | -1.88766300 | -1.77069400 | 0.00838800  |
| O | 2.82906500  | 0.62472600  | 0.03978500  |

|   |             |             |             |
|---|-------------|-------------|-------------|
| H | -3.13375300 | -2.24661700 | 0.13033300  |
| O | 4.32384000  | -1.06494800 | 0.23557600  |
| H | 5.00206000  | -0.40289900 | 0.44963100  |
| H | -1.97627000 | 2.12391800  | 1.66559300  |
| O | 0.42693900  | 1.84606300  | -0.68294900 |
| H | 0.65631500  | 2.58879500  | -1.24144800 |
| H | 1.26300900  | 1.42086500  | -0.43136200 |

**PRC-Ser**

|   |             |             |             |
|---|-------------|-------------|-------------|
| N | -1.65805100 | -1.00085200 | 0.54299600  |
| H | -1.99184400 | -1.38913000 | 1.41669100  |
| C | -2.37215000 | -0.18255500 | -0.11832600 |
| H | -1.95335100 | 0.21798600  | -1.03778600 |
| C | -3.74463600 | 0.24229400  | 0.26019900  |
| C | 3.59684500  | 0.68339300  | -0.14105100 |
| H | -4.41742800 | -0.53675700 | -0.13217300 |
| H | -3.85165800 | 0.24892900  | 1.35213700  |
| O | -3.95662600 | 1.48720100  | -0.32389800 |
| O | 3.09533000  | -0.34184800 | 0.19640100  |
| H | -4.87787500 | 1.73887800  | -0.25558200 |
| O | 4.77070400  | 1.17804300  | 0.09745800  |
| H | 5.30809200  | 0.57882800  | 0.64169800  |
| H | -0.70513000 | -1.28311700 | 0.18694000  |
| O | 0.68732100  | -1.52542100 | -0.55118100 |
| H | 1.51917300  | -1.09655300 | -0.29136100 |
| H | 0.92220000  | -2.31569800 | -1.03670900 |

## V. References

1. S. F. Boys and F. Bernardi, The calculation of small molecular interactions by the differences of separated total. *Mol. Phys.* 1970, **19**, 553–566.
